# Supplementary material for: Deep spatial-omics analysis of Head & Neck carcinomas provides alternative therapeutic targets and rationale for treatment failure
Source: PubMed Central journal article supplement (PMC10499928; doi:10.1038/s41698-023-00444-2), 2023-09-13
Supplement: 41698_2023_444_MOESM1_ESM.pdf [file 41698_2023_444_MOESM1_ESM.pdf]

# Supplementary Information

Supplement to: Causer A., Tan X., Lu X. *et al.* *Deep spatial-omics analysis of Head & Neck carcinomas provides alternative therapeutic targets and rationale for treatment failure*

## Supplementary Information Table of Contents

| Content                     |                                                                                                                                              | Page |
|-----------------------------|----------------------------------------------------------------------------------------------------------------------------------------------|------|
| 1. Supplementary Table 1    | <i>Spatial proteomics: PhenoCycler antibody panel.</i>                                                                                       | 4    |
| 2. Supplementary Table 2    | <i>Spatial proteomics: cell type annotation based on surface protein expression.</i>                                                         | 4    |
| 3. Supplementary Figure 1   | <i>Flow-diagram representing the implemented workflow.</i>                                                                                   | 5    |
| 4. Supplementary Figure 2   | <i>High-resolution H&amp;E images of MAR21 and SEP21 samples.</i>                                                                            | 6    |
| 5. Supplementary Figure 3   | <i>UMAP representation of unbiased Visium clustering of MAR21 and healthy paired samples.</i>                                                | 7    |
| 6. Supplementary Figure 4   | Distinct transcriptional profiles of inner core and leading-edge clusters.                                                                   | 7    |
| 7. Supplementary Figure 5   | <i>Spatial transcriptomics (Phenocycler)-informed cell identification (SPiCi) and established transcription-based deconvolution methods.</i> | 8    |
| 8. Supplementary Figure 6   | <i>Integrated Spatial-Omic characterization of tumor immune cell microenvironments.</i>                                                      | 9    |
| 9. Supplementary Figure 7   | <i>Comparison of deconvolution methods and SPiCi results with pathologist annotation.</i>                                                    | 10   |
| 10. Supplementary Figure 8  | <i>Localization of proliferating tumor cells.</i>                                                                                            | 11   |
| 11. Supplementary Figure 9  | <i>Differential analysis of transcriptional profiles of tumor clusters within MAR21 OPSCC.</i>                                               | 12   |
| 12. Supplementary Figure 10 | <i>PD-L1 and PD-1 protein detection.</i>                                                                                                     | 13   |
| 13. Supplementary Figure 11 | <i>Visium data integration and batch correction of tumor tissues.</i>                                                                        | 13   |
| 14. Supplementary Figure 12 | <i>Tumor transcriptional profile recapitulated in recurrent SEP21 OPSCC.</i>                                                                 | 14   |
| 15. Supplementary Figure 13 | <i>Initial Pathologist annotation of SEP21 OPSCC sample.</i>                                                                                 | 15   |
| 16. Supplementary Figure 14 | <i>Differential expression analysis of tumor clusters 4 and 7 in the MAR21-SEP21 OPSCC integrated dataset.</i>                               | 15   |
| 17. Supplementary Figure 15 | <i>Ligand-receptor interaction analysis in MAR21 and SEP21 tissues.</i>                                                                      | 16   |

|                                     |                                                                                                                                                |    |
|-------------------------------------|------------------------------------------------------------------------------------------------------------------------------------------------|----|
| <b>18. Supplementary Figure 16</b>  | <i>Transcriptional comparison between MAR21 and recurrent SEP21 and ligand-receptor interaction analysis for therapeutic target selection.</i> | 17 |
| <b>19. Supplementary Figure 17</b>  | <i>Top druggable targets differ between additional OPSCC patients.</i>                                                                         | 18 |
| <b>20. Supplementary Table 3</b>    | <i>Gene classification based on function reported in the literature in the cancer setting.</i>                                                 | 19 |
| <b>21. Supplementary Table 4</b>    | <i>Identified clinical and preclinical targets.</i>                                                                                            | 26 |
| <b>22. Supplementary References</b> |                                                                                                                                                | 46 |

## 1. Supplementary Table 1

| AKOYA Antibody | AKOYA Tag number | AKOYA PIN | Target cell                                  |
|----------------|------------------|-----------|----------------------------------------------|
| CD20           | BX007            | 4450018   | B and T cell subsets                         |
| PanCK          | BX019            | 4450020   | Epithelial cells                             |
| CD8a           | BX026            | 4250012   | T cell subsets, NK subset                    |
| Ki67           | BX047            | 4250019   | Proliferating cells                          |
| CD45Ro         | BX017            | 4250023   | Activated and memory T cells, B cell subsets |
| CD3e           | BX045            | 4450030   | T cells, NK-T cells, thymocytes              |
| CD107a         | BX006            | 4350001   | Degranulation marker                         |
| HLA-DR         | BX033            | 4450029   | Activated B cells, antigen presenting cells  |
| CD4            | BX003            | 4350018   | T cell subsets, monocytes, macrophages       |
| CD68           | BX015            | 4350019   | Monocytes, macrophages                       |
| CD45           | CX021            | 4450042   | Hematopoietic cells                          |
| PD-1           | RX046            | 4550038   | Activation/exhaustion                        |
| PD-L1          | BX043            | 4550072   | Inhibitory signal                            |

Supplementary table 1. **Spatial proteomics: PhenoCycler antibody panel.**

## 2. Supplementary Table 2

| Cell Type               | Marker Proteins         |
|-------------------------|-------------------------|
| Tumor                   | PANCK                   |
| Tumor infiltrating cell | CD45                    |
| Dividing Tumor          | PANCK, Ki67             |
| Antigen presenting cell | CD45, HLA-DR            |
| T cell                  | CD45, Cd3e              |
| B cell                  | CD45, CD20              |
| Activated B cell        | CD45, CD20, CD8         |
| CD8 T cell              | CD45, Cd3e, CD8         |
| CD4 T cell              | CD45, Cd3e, CD4         |
| Activated CD8 T cell    | CD45, Cd3e, CD8, CD107a |
| Activated CD4 T cell    | CD45, Cd3e, CD4, CD107a |
| Memory CD8 T cell       | CD45, Cd3e, CD8, CD45R0 |
| Memory CD4 T cell       | CD45, Cd3e, CD4, CD45R0 |
| Dividing CD8 T cell     | CD45, Cd3e, CD8, Ki67   |
| Dividing CD4 T cell     | CD45, Cd3e, CD4, Ki67   |
| Macrophage/Monocyte     | CD45, CD68              |
| Dividing Macrophage     | CD45, CD68, Ki67        |

Supplementary table 2. **Spatial proteomics: cell type annotation based on surface protein expression.**

### 3. Supplementary Figure 1

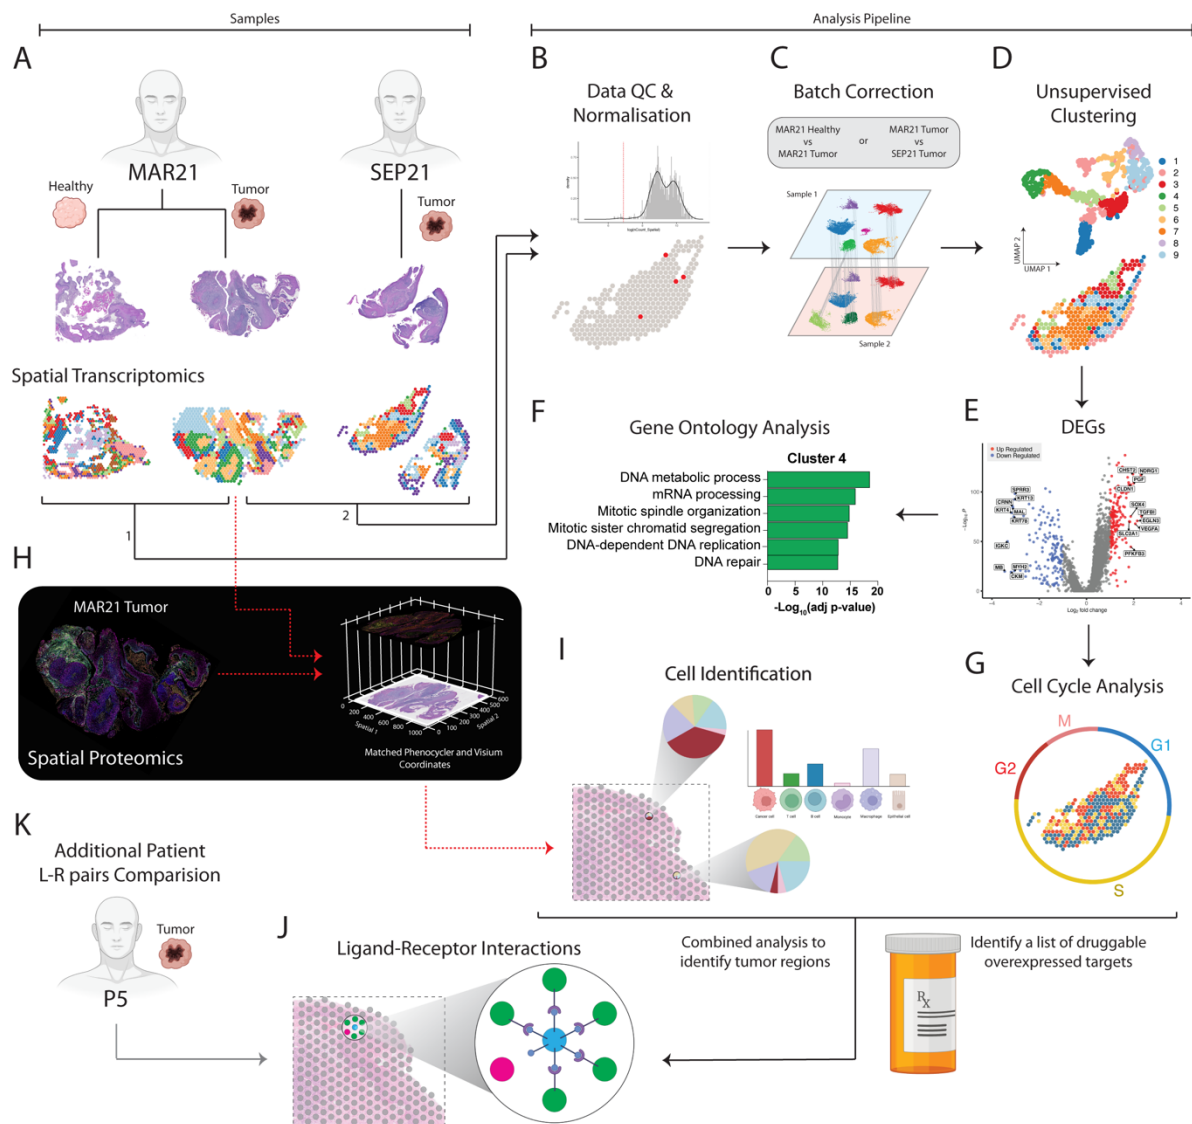

Supplementary Figure 1. **Flow-diagram representing the implemented workflow.** **A.** Displays the different samples being analyzed within the study. Two comparisons are performed: 1) between healthy and tumor samples of MAR21 sample. 2) between MAR21 and SEP21 tumor samples. Both comparisons undergo analysis through the same pipeline which includes: **B.** Data quality control and normalization, **C.** Batch correction between samples, **D.** Unsupervised clustering to identify spots of similar transcriptomic profiles. **E.** Differential gene expression analysis, **F.** Gene ontology term enrichment analysis, and **G.** Cell cycle state analysis. **H.** In addition to spatial transcriptomics, spatial proteomics was performed on the MAR21 tumor sample. Integration of spatial transcriptomics and proteomics was performed to inform **I.** Spot cell composition. The overall analysis was used to identify and analyze the tumor regions within the samples. **J.** Ligand-receptor (L-R) interaction analysis was then performed to identify the most active L-R pairs which are druggable targets. **K.** An additional patient was analyzed in combination to assess if the L-R pairs are patient-specific. **L.** L-R pair activity was further assessed through pathway analysis of differentially expressed genes. **M.** The collective findings were then used to determine the top druggable targets specific to the patient.

#### 4. Supplementary Figure 2

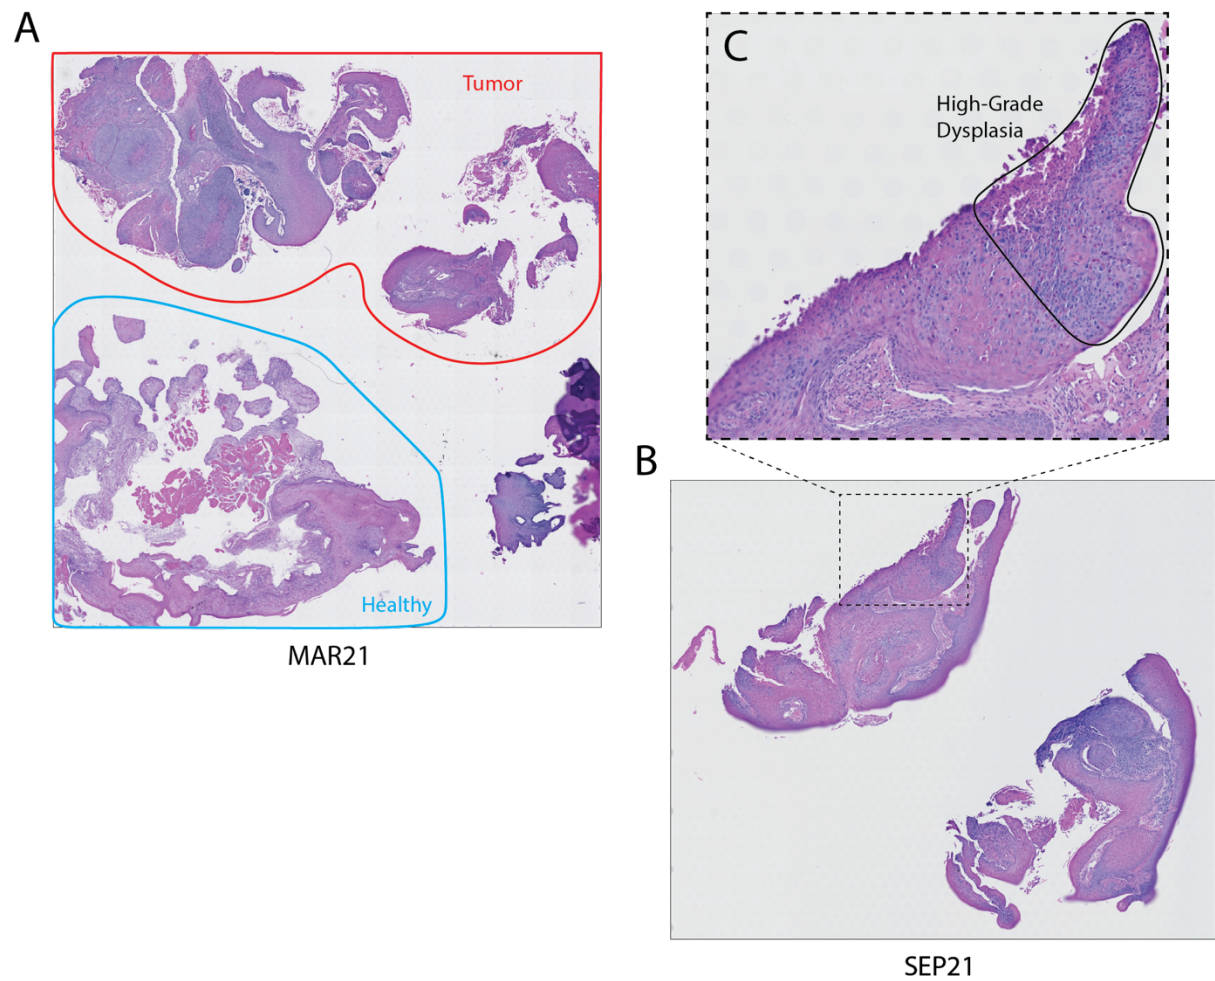

Supplementary Figure 2. **High-resolution H&E images of MAR21 and SEP21 samples.** **A.** Displays the high-resolution H&E image of both the healthy and tumor MAR21 sample. **B.** The high-resolution H&E image of SEP21 tumor samples. **C.** The highlighted box represents the tissue region which pathologists identified as high-grade dysplasia after re-analysis of the original H&E image. The raw images have been made publicly accessible at <https://doi.org/10.48610/698bb9e>.

## 5. Supplementary Figure 3

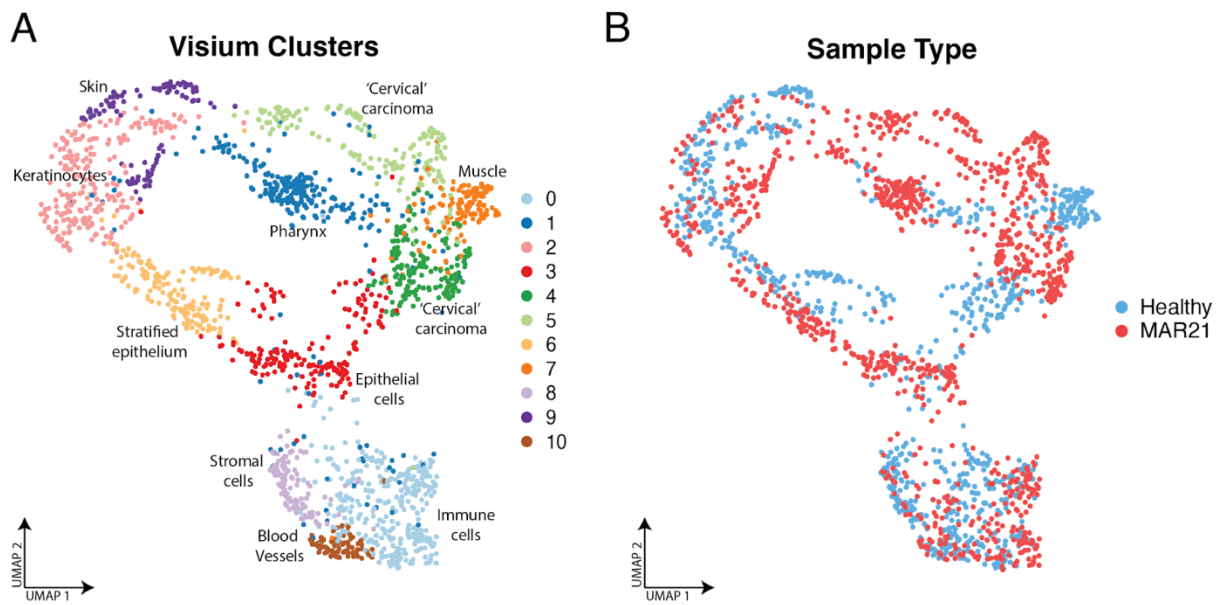

Supplementary Figure 3. **UMAP representation of unbiased Visium clustering of MAR21 and healthy paired samples.** UMAP of clusters highlights distinction and separation between populations. **A.** Cluster annotations were generated by comparing differentially overexpressed genes with a reference database (JENSENs Tissues; EnrichR). **B.** Sample type UMAP displays batch correction between healthy (blue) and MAR21 OPSCC (red) samples.

## 6. Supplementary Figure 4

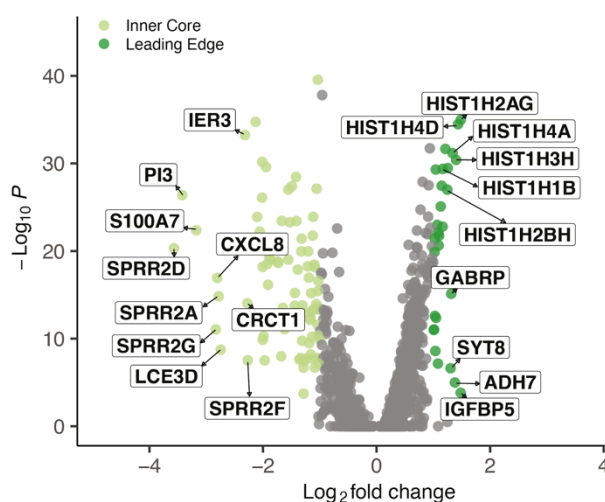

Supplementary Figure 4. **Distinct transcriptional profiles of inner core and leading-edge clusters.** DEGs between newly defined Visium clusters 4 (dark green) and 5 (light green). Significant DEGs with Wilcoxon test  $p$ -value  $< 0.001$  and fold-change  $> 1$  are colored based on cluster.

## 7. Supplementary Figure 5

**A**

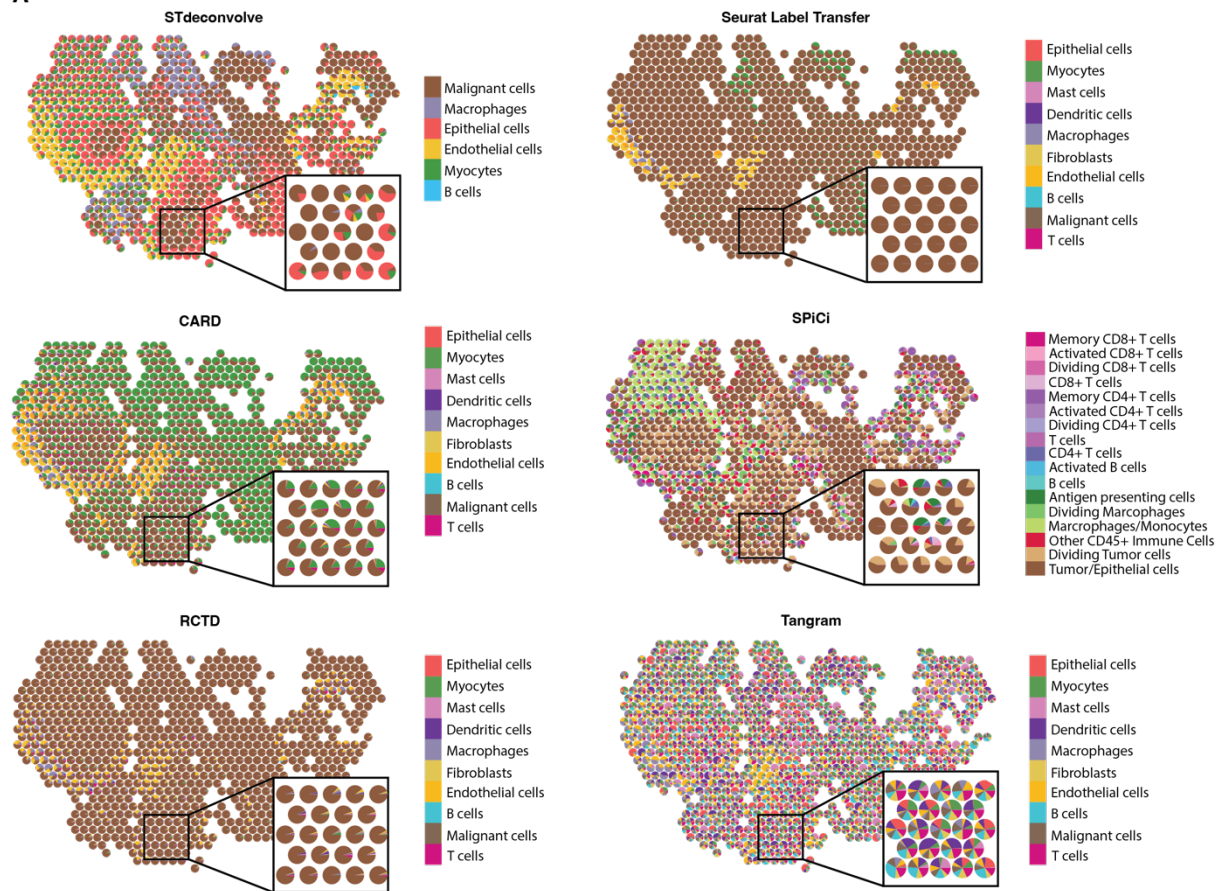

**B**

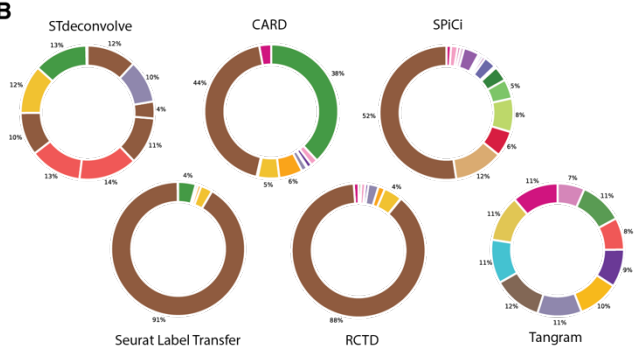

Supplementary Figure 5. **Spatial transcriptomics (Phenocycler)-informed cell identification (SPiCi) and established transcription-based deconvolution methods.** **A.** Displays spot cell annotation of tumor sample using each algorithm. Spots are represented as pie graphs denoting the proportions of each cell type identified within each spot capture region. Enlarged regions encapsulate the outer proliferating ring of the tumor and the immune cell infiltrated core. **B.** Overall percentages of different cell types identified by each approach (across all spots combined).



## 8. Supplementary Figure 6

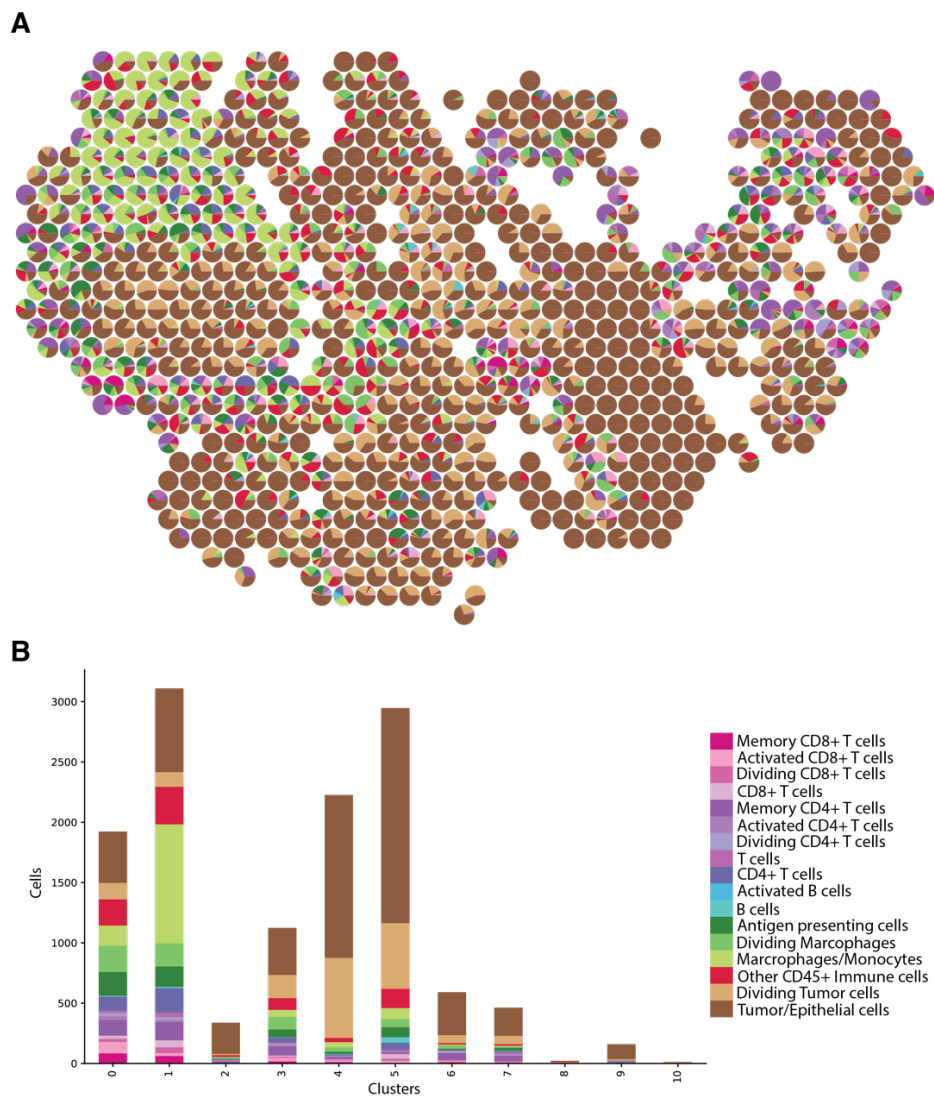

Supplementary Figure 6. **Integrated Spatial-Omic characterization of tumor immune cell microenvironments.** **A.** Visium spot cell identification of MAR21 OPSCC using *SPiCi*. Spots are presented as pie-charts representing the relative proportions of cell types located within each spot. **B.** Quantification of cell-types found within each Visium cluster.

## 9. Supplementary Figure 7

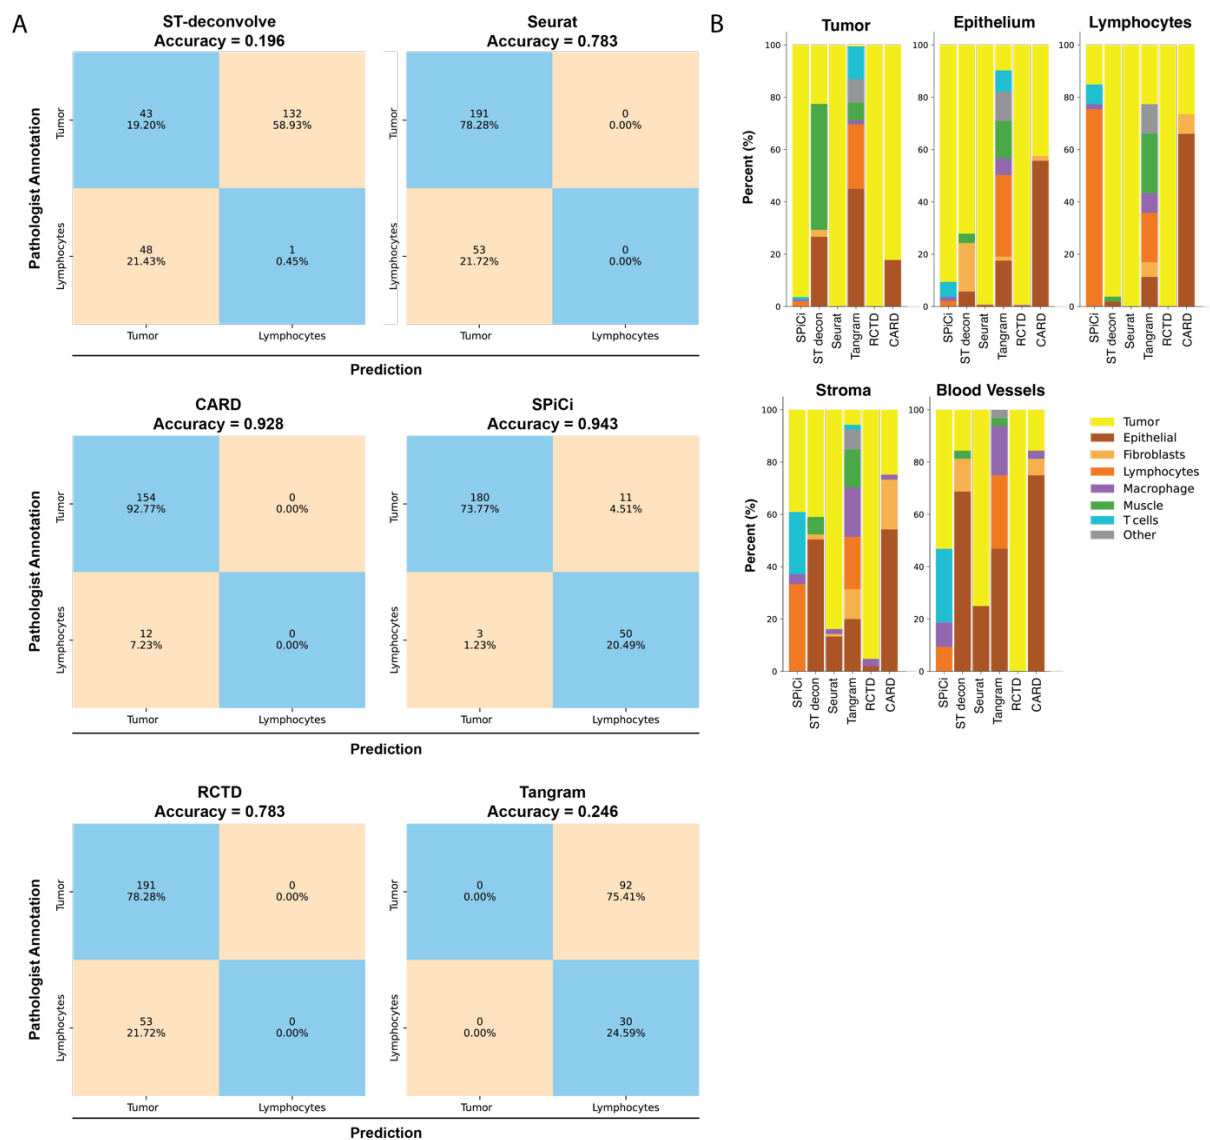

Supplementary Figure 7. **Comparison of deconvolution methods and *SPiCi* results with pathologist annotation.** **A.** Confusion matrices were calculated to evaluate the performance of each method at detecting tumor and lymphocyte cells compared to the ground truth pathological annotation. The cell type label for each spot is determined by the cell type with the highest proportion (i.e., classification probability) for that spot, calculated by each method. The inferred spot labels were then compared with the ground truth pathological annotations. Accuracy rates were calculated based on results generated from each confusion matrix. **B.** Bar graphs indicate the proportion of various cell types predicted by each method with respect to each cell type identified by pathologist annotation.

10. Supplementary Figure 8

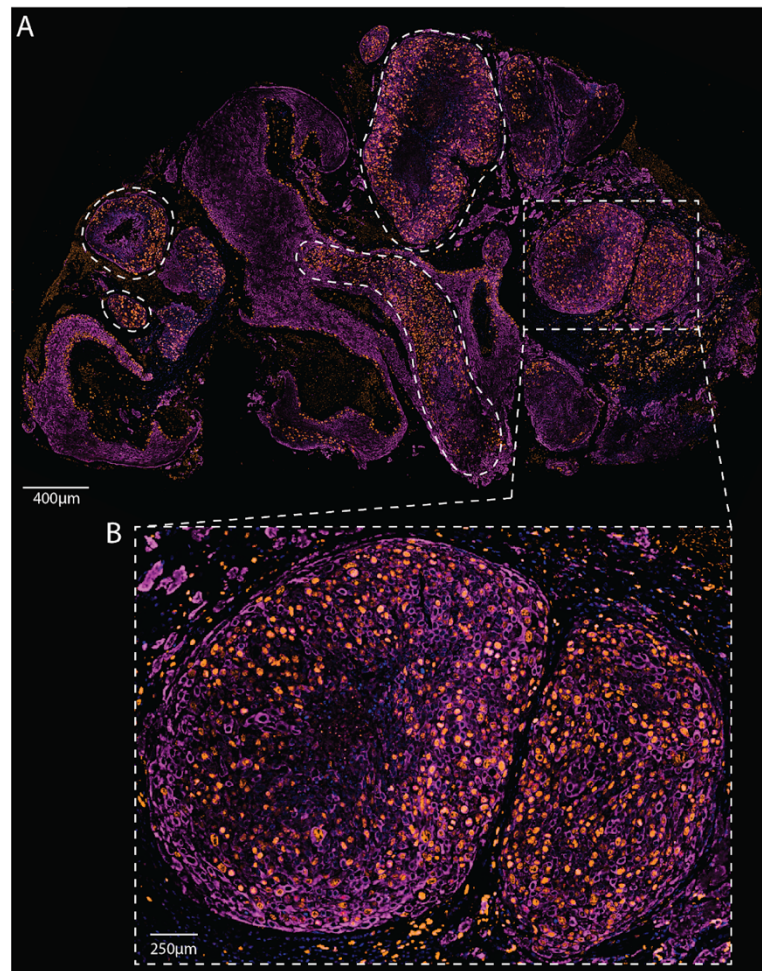

Supplementary Figure 8. **Localization of proliferating tumor cells.** **A.** PhenoCycler fluorescence images displaying PanCK+ (Purple) and Ki67+ (Orange) cells across the MAR21 OPSCC sample. **B.** Tumor region of interest presents with leading edge of active proliferating cells and inactive tumor core.

## 11. Supplementary Figure 9

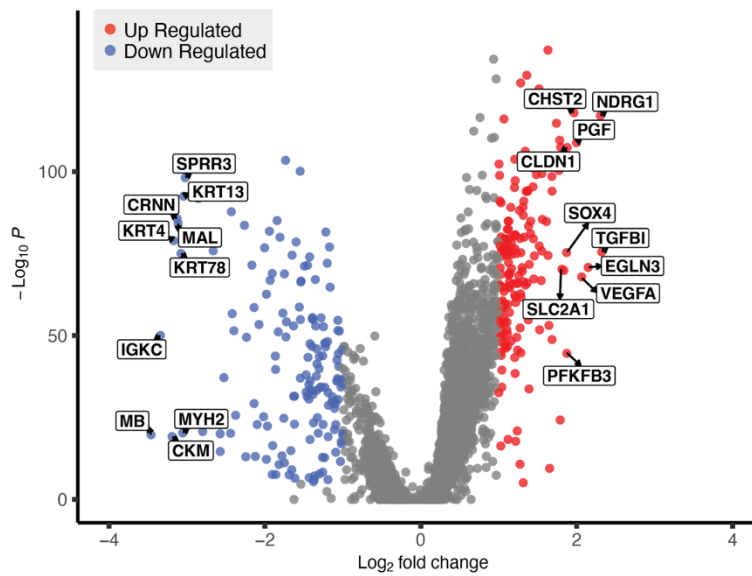

Supplementary Figure 9. **Differential analysis of transcriptional profiles of tumor clusters within MAR21 OPSCC.** DEGs of the combined tumor clusters relative to all other clusters. Significantly up-regulated and down-regulated genes are highlighted in red and blue respectively (Wilcoxon test  $p$ -value  $< 0.001$  and an absolute fold-change  $> 1$ ). The top 10 over- and under-expressed genes are annotated.

## 12. Supplementary Figure 10

MAR21

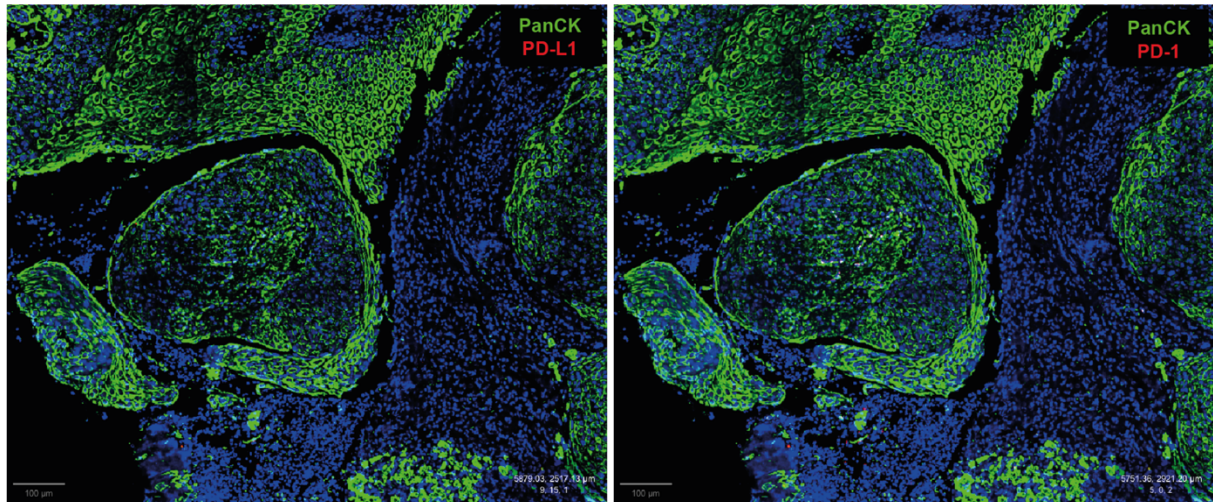

SEP21

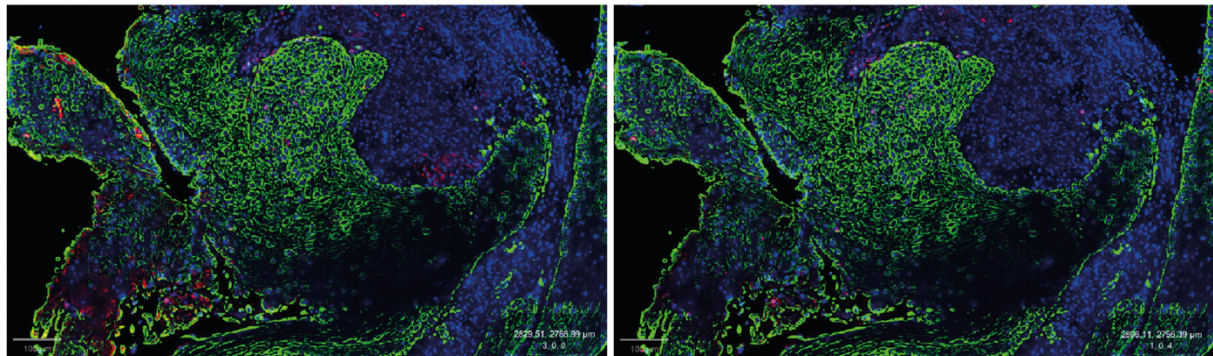

Supplementary Figure 10. **PD-L1 and PD-1 protein staining.** A. PHENOCYCLER fluorescence images displaying PanCK+ (green) and PD-L1 (red, *left*) or PD-1 (red, *right*) cells across the MAR21 and SEP21 OPSCC samples.

## 13. Supplementary Figure 11

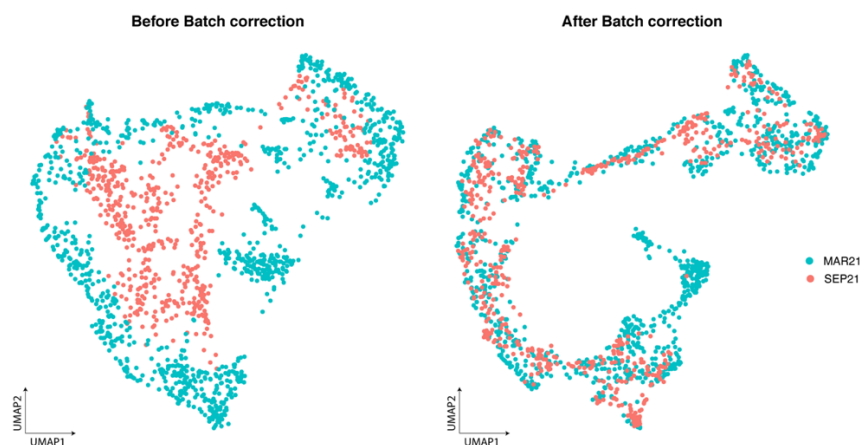

Supplementary Figure 11. **Visium data integration and batch correction of tumor tissues.** Spatial transcriptomic data generated from MAR21 and SEP21 tumors was integrated (*left*) and batch effect corrected (*right*) using the Seurat anchor integration pipeline.

## 14. Supplementary Figure 12

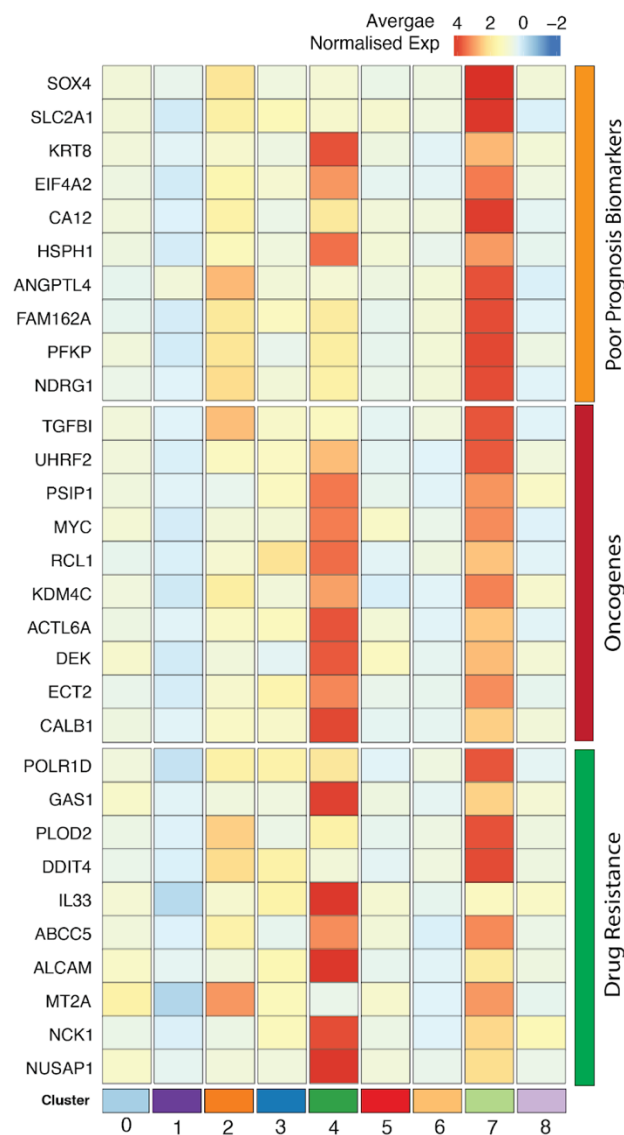

Supplementary Figure 12. **Tumor transcriptional profile recapitulated in recurrent SEP21 OPSCC.** Relative expression of poor prognosis markers (red), oncogenes (orange) and drug resistance genes (green), previously identified from the combined tumor cluster within MAR21, across each newly defined cluster generated through comparing OPSCC samples. The top 9 genes of each category were displayed. Colors gradient represents average normalized expression values across all spots in each cluster, which were z-transformed by genes (rows of the heatmap).

## 15. Supplementary Figure 13

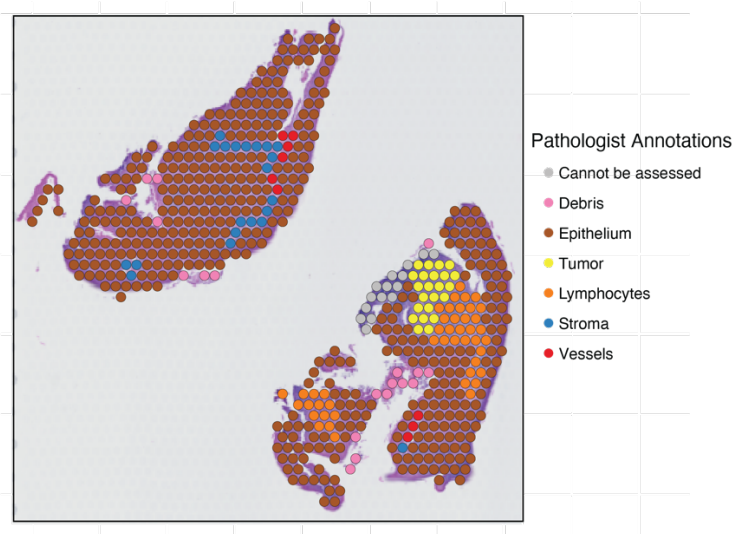

Supplementary Figure 13. **Initial Pathologist annotation of SEP21 OPSCC sample.** Colored spots identify different morphological tissue structure identified from the H&E image by a clinical pathologist.

## 16. Supplementary Figure 14

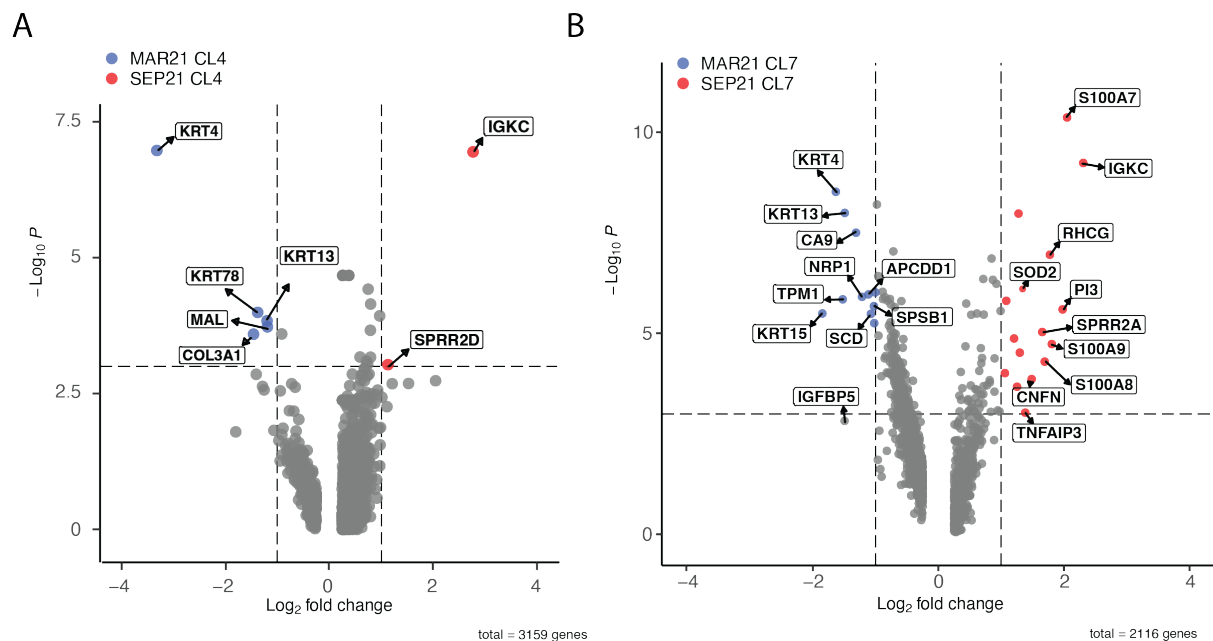

Supplementary Figure 14. **Differential expression analysis of tumor clusters 4 and 7 in the MAR21-SEP21 OPSCC integrated dataset.** DEGs of the tumor clusters CL4 (A) and CL7 (B) from MAR21 and SEP21 samples. Significantly up-regulated and down-regulated genes are highlighted in red and blue respectively (Wilcoxon test  $p$ -value  $< 0.001$  and an absolute fold-change  $> 1$ ). The top over- and under-expressed genes based on fold change and  $P$ -values are annotated.

## 17. Supplementary Figure 15

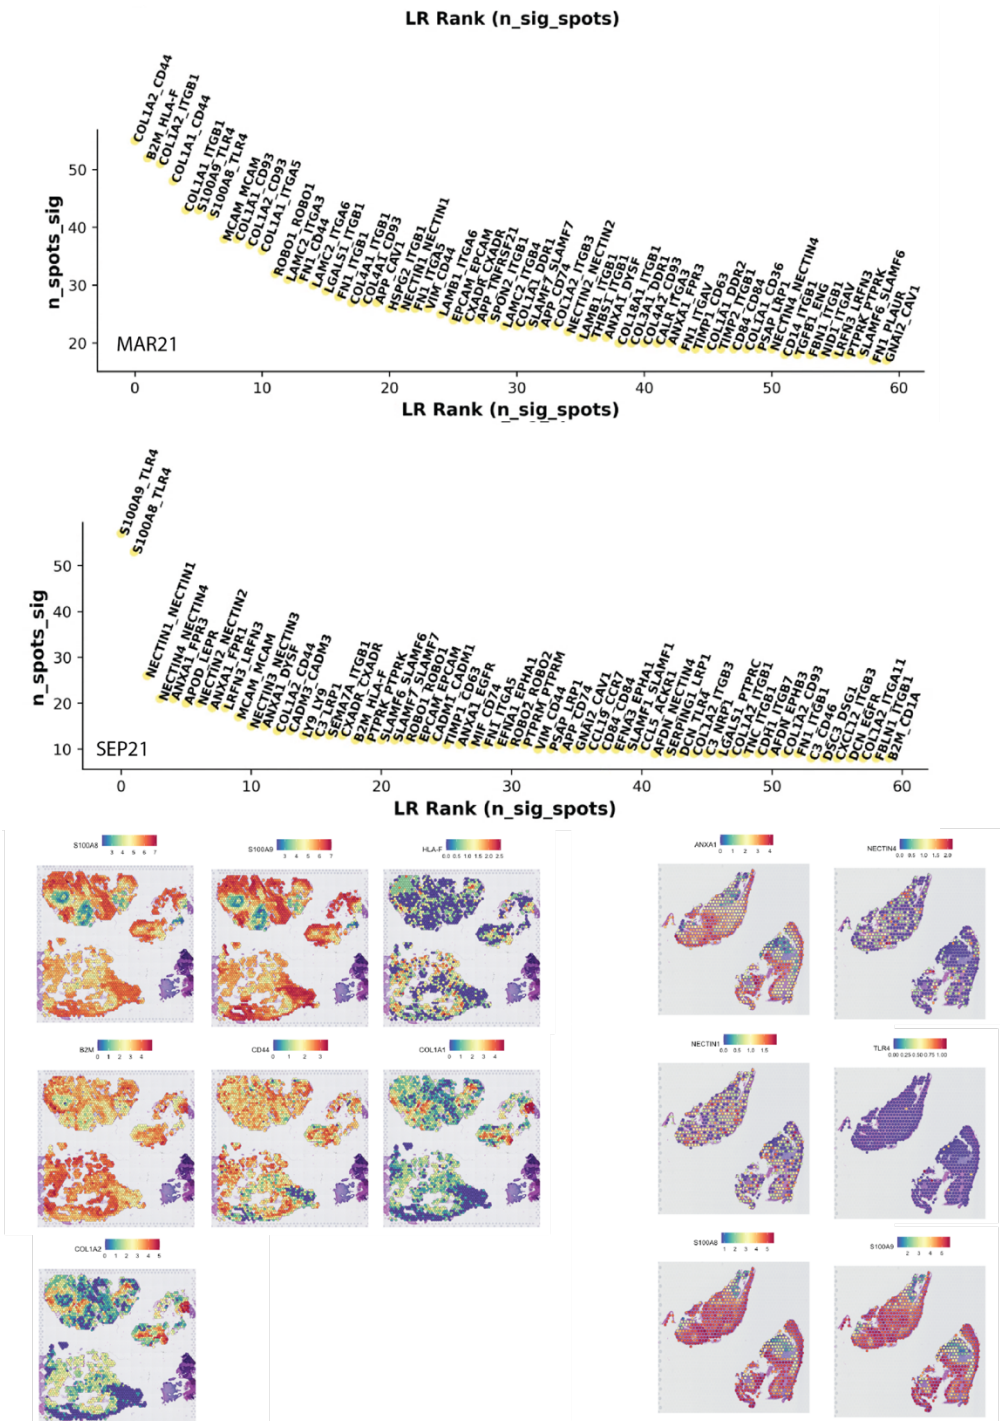

Supplementary Figure 15. **Ligand-receptor interaction analysis in MAR21 and SEP21 tissues. A.** Ranking of top 60 Ligand/Receptor (L/R) expressed by the MAR21 (*top*) and recurrent SEP21 (*bottom*). Rank was based on the number of spots with significant interactions of each L/R pair across each sample. **B.** Spatial expression of top L/R pairs expressed by MAR21(*left*) and SEP21(*right*). In all feature plots, the relative gene expression per spot is indicated by the coloured scale bars.



18. Supplementary Figure 16

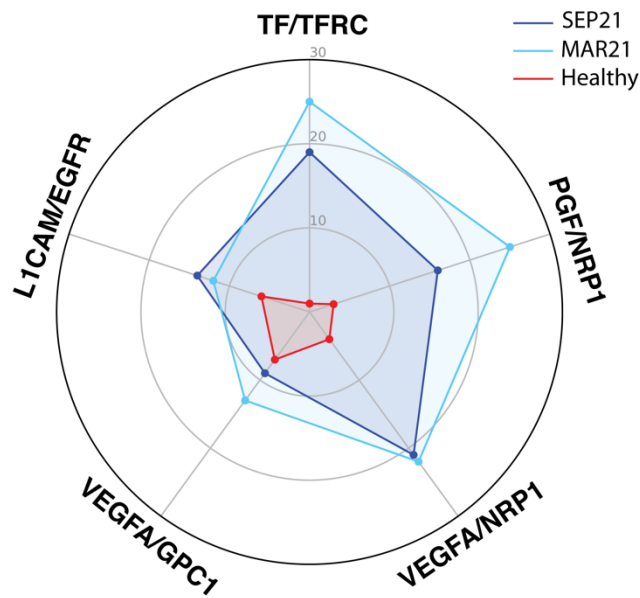

Supplementary Figure 16. **Transcriptional comparison between MAR21 and recurrent SEP21 and ligand-receptor interaction analysis for therapeutic target selection.** Spider-plot represents the top 5 most active L-R pairs found across tumor tissue based on the number of spots with significant interactions using the L-R pairs. Red line, healthy tissue; dark blue, SEP21; light blue, MAR21.

## 19. Supplementary Figure 17

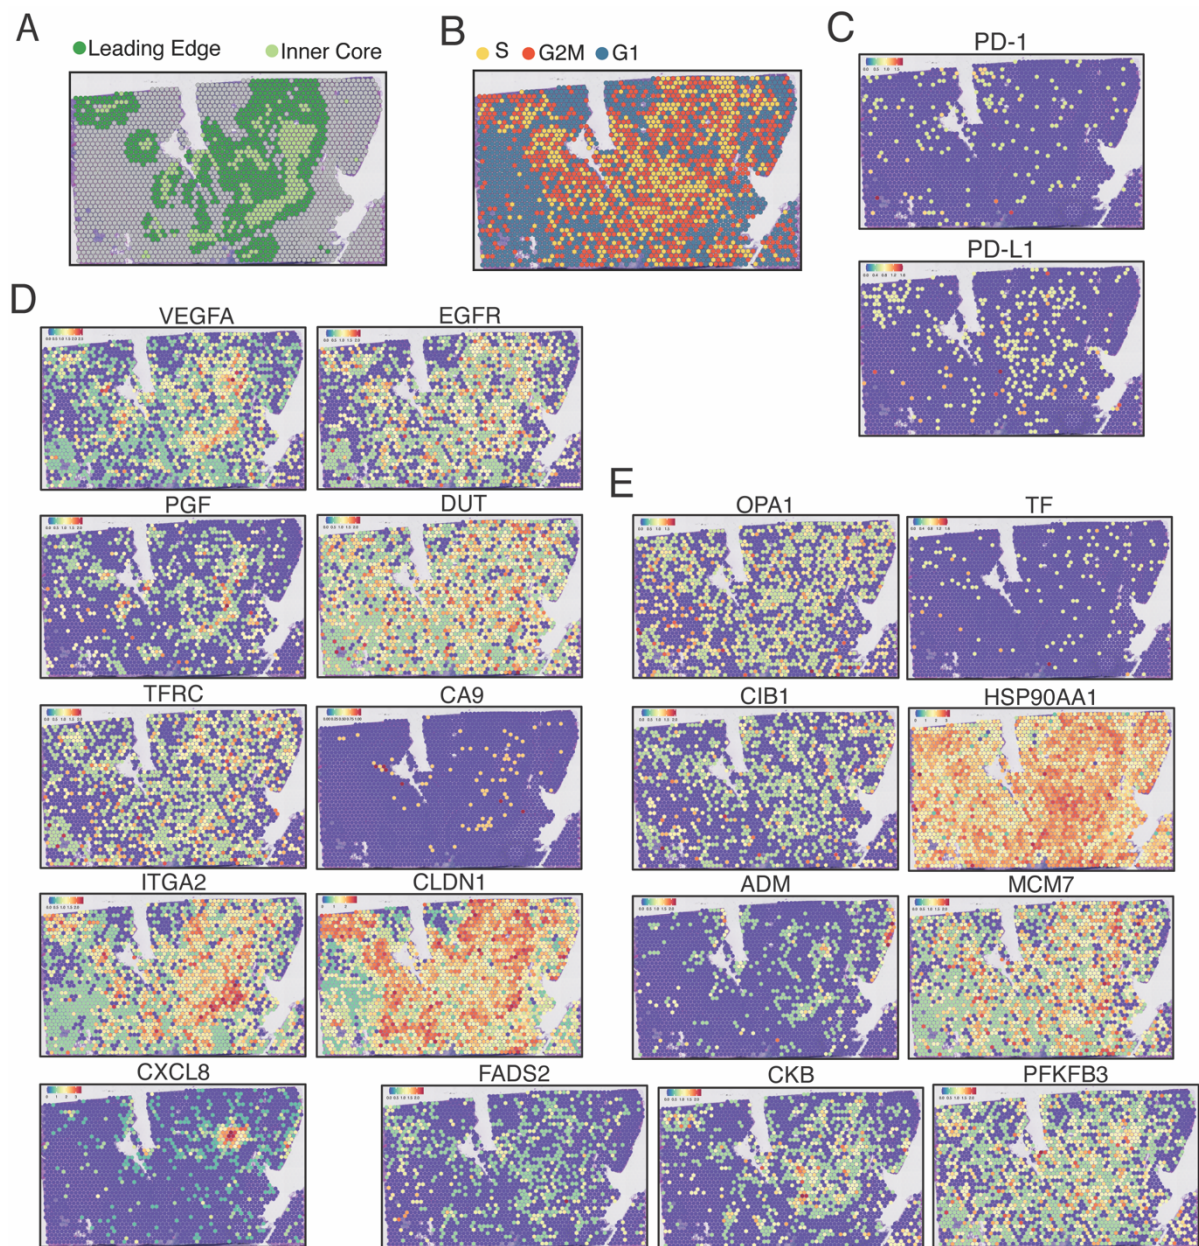

Supplementary Figure 17. **Top druggable targets differ between additional OPSCC patients.** **A.** Spatial representation of Visium clusters identified as tumor leading edge (dark green) and inner core (light green) within an additional OPSCC patient. **B.** Cell cycle phase of each spot based on relative expression of specific cell phase genes. **C.** Spatial expression of genes targeted by Nivolumab and Pembrolizumab targeted *PD-1/PD-L1* pathway. **D.** Spatial visualization of gene expression of genes targeted by previously identified clinical therapies. **E.** Spatial localization of gene expression levels for select experimental drug therapies. In all feature plots, the relative gene expression per spot is indicated by the coloured scale bars.

Supplementary table 3. **Gene classification based on function reported in the literature in the cancer setting.**

| <b>Gene</b> | <b>Categories</b>                 | <b>Ref</b> |
|-------------|-----------------------------------|------------|
| HAUS6       | Oncogenes                         | 1          |
| DBN1        | Oncogenes                         | 2-4        |
| CCNL1       | Oncogenes                         | 5          |
| ACTL6A      | Oncogenes                         | 6          |
| CHAF1A      | Oncogenes                         | 7,8        |
| DEK         | Oncogenes                         | 9          |
| ECT2        | Oncogenes                         | 10,11      |
| EIF4EBP1    | Oncogenes                         | 12         |
| FXR1        | Oncogenes                         | 13         |
| JUN         | Oncogenes                         | 14         |
| KDM4C       | Oncogenes                         | 15         |
| MYBL2       | Oncogenes                         | 16         |
| MYC         | Oncogenes                         | 17         |
| NSD2        | Oncogenes                         | 18         |
| PFDN2       | Oncogenes                         | 19         |
| PSIP1       | Oncogenes                         | 20         |
| RNF19A      | Oncogenes                         | 21         |
| TAGLN2      | Oncogenes                         | 22,23      |
| TGFBI       | Oncogenes                         | 24         |
| UHRF2       | Oncogenes                         | 25         |
| VAV3        | Oncogenes                         | 26,27      |
| JAG1        | Oncogenes                         | 28,29      |
| CENPW       | Oncogenes                         | 30,31      |
| SMC4        | Good and Poor prognosis biomarker | 32,33      |
| COL7A1      | Good prognosis biomarker          | 34         |

|         |                          |       |
|---------|--------------------------|-------|
| CXADR   | Good prognosis biomarker | 35    |
| FOXRED2 | Good prognosis biomarker | 36    |
| LPAR3   | Good prognosis biomarker | 37    |
| MEI1    | Good prognosis biomarker | 38    |
| NEFH    | Good prognosis biomarker | 39    |
| VLDLR   | Good prognosis biomarker | 40    |
| PGK1    | Poor prognosis biomarker | 41    |
| ANGPTL4 | Poor prognosis biomarker | 42    |
| ANP32E  | Poor prognosis biomarker | 43    |
| ATP13A3 | Poor prognosis biomarker | 44    |
| BHLHE40 | Poor prognosis biomarker | 45,46 |
| CA12    | Poor prognosis biomarker | 47    |
| CALB1   | Poor prognosis biomarker | 48    |
| CCT3    | Poor prognosis biomarker | 49-51 |
| CENPJ   | Poor prognosis biomarker | 52    |
| CPA4    | Poor prognosis biomarker | 53    |
| CSE1L   | Poor prognosis biomarker | 54    |
| DSC3    | Poor prognosis biomarker | 55    |
| DVL3    | Poor prognosis biomarker | 56    |
| EIF4A2  | Poor prognosis biomarker | 57    |
| FAM162A | Poor prognosis biomarker | 58    |
| FAT2    | Poor prognosis biomarker | 59    |
| GTF3A   | Poor prognosis biomarker | 60    |
| HILPDA  | Poor prognosis biomarker | 61    |
| HSPA1A  | Poor prognosis biomarker | 62    |
| HSPA1B  | Poor prognosis biomarker | 62    |
| HSPE1   | Poor prognosis biomarker | 63    |

|        |                          |       |
|--------|--------------------------|-------|
| HSPH1  | Poor prognosis biomarker | 64    |
| IER3   | Poor prognosis biomarker | 65    |
| KRT8   | Poor prognosis biomarker | 66    |
| LAMA5  | Poor prognosis biomarker | 67,68 |
| LPCAT1 | Poor prognosis biomarker | 69,70 |
| NFIL3  | Poor prognosis biomarker | 71    |
| NRARP  | Poor prognosis biomarker | 72,73 |
| NUP58  | Poor prognosis biomarker | 74    |
| NXPH4  | Poor prognosis biomarker | 75    |
| PCLAF  | Poor prognosis biomarker | 76    |
| PFKP   | Poor prognosis biomarker | 77    |
| PLAUR  | Poor prognosis biomarker | 78    |
| PLPP2  | Poor prognosis biomarker | 79    |
| PNCK   | Poor prognosis biomarker | 80    |
| PODXL2 | Poor prognosis biomarker | 81    |
| PSMD2  | Poor prognosis biomarker | 82    |
| PTHLH  | Poor prognosis biomarker | 83    |
| PUM3   | Poor prognosis biomarker | 84    |
| RFC3   | Poor prognosis biomarker | 85    |
| RFC4   | Poor prognosis biomarker | 86    |
| RHOV   | Poor prognosis biomarker | 21    |
| RUVBL1 | Poor prognosis biomarker | 87    |
| SAT1   | Poor prognosis biomarker | 88    |
| SLC2A1 | Poor prognosis biomarker | 89    |
| SNAI2  | Poor prognosis biomarker | 90    |
| SOD2   | Poor prognosis biomarker | 91,92 |
| SOX4   | Poor prognosis biomarker | 93    |

|         |                          |         |
|---------|--------------------------|---------|
| STC2    | Poor prognosis biomarker | 94,95   |
| TBL1XR1 | Poor prognosis biomarker | 96      |
| TCN1    | Poor prognosis biomarker | 97      |
| TCP1    | Poor prognosis biomarker | 98      |
| TFDP1   | Poor prognosis biomarker | 99      |
| TMEM189 | Poor prognosis biomarker | 100,101 |
| U2SURP  | Poor prognosis biomarker | 102     |
| UBE2C   | Poor prognosis biomarker | 26      |
| YEATS2  | Poor prognosis biomarker | 103     |
| ABCC5   | Drug Resistance          | 104     |
| ALCAM   | Drug Resistance          | 105     |
| CALCRL  | Drug Resistance          | 106,107 |
| FBXO42  | Drug Resistance          | 108     |
| GAS1    | Drug Resistance          | 109     |
| IL33    | Drug Resistance          | 110     |
| MKKN2   | Drug Resistance          | 111     |
| MT2A    | Drug Resistance          | 112,113 |
| NCK1    | Drug Resistance          | 114     |
| NUSAP1  | Drug Resistance          | 115     |
| PGF     | Drug Resistance          | 116     |
| PLOD2   | Drug Resistance          | 117     |
| POLR1D  | Drug Resistance          | 118     |
| PGK1    | Drug Resistance          | 41      |
| NES     | Drug Resistance          | 119     |
| CERS2   | Tumor suppressor         | 120     |
| DLG1    | Tumor suppressor         | 121     |
| FLNB    | Tumor suppressor         | 122     |

|         |                                                                             |         |
|---------|-----------------------------------------------------------------------------|---------|
| GADD45A | Tumor suppressor                                                            | 123     |
| HLTF    | Tumor suppressor                                                            | 124     |
| HMG20B  | Tumor suppressor                                                            | 125     |
| IL12RB2 | Tumor suppressor                                                            | 126,127 |
| ILF3    | Tumor suppressor                                                            | 128     |
| IRF6    | Tumor suppressor                                                            | 129,130 |
| MT1G    | Tumor suppressor                                                            | 131     |
| MT1X    | Tumor suppressor                                                            | 132     |
| NDRG1   | Tumor suppressor                                                            | 133     |
| RBM38   | Tumor suppressor                                                            | 134     |
| RCL1    | Tumor suppressor                                                            | 135     |
| RSRC1   | Tumor suppressor                                                            | 136     |
| SEMA4B  | Tumor suppressor                                                            | 137     |
| DDIT4   | Tumor suppressor                                                            | 138,139 |
| EFNA1   | Tumor suppressor                                                            | 140     |
| NRG1    | Tumor suppressor                                                            | 141     |
| ALDH1A3 | Drug Resistance (chemoresistance in colorectal cancer); Experimental target | 142,143 |
| HMGB1   | Experimental target                                                         | 144     |
| CNFN    | Good prognosis marker                                                       | 145     |
| CYSRT1  | Good prognosis marker                                                       | 146,147 |
| IGKC    | Good prognosis marker                                                       | 148     |
| IGKV4-1 | Good prognosis marker                                                       | 149     |
| IGLC1   | Good prognosis marker                                                       | 150     |
| JCHAIN  | Good prognosis marker                                                       | 151     |
| IGHA1   | Good prognosis marker                                                       | 152     |
| IGHG1   | Good prognosis marker                                                       | 152     |
| IGHG2   | Good prognosis marker                                                       | 152     |

|        |                       |         |
|--------|-----------------------|---------|
| IGHG4  | Good prognosis marker | 152     |
| CALB1  | Oncogene              | 48,153  |
| LCN2   | Oncogene              | 154     |
| TGFBI  | Oncogene              | 24      |
| XBP1   | Oncogene              | 155     |
| COL1A1 | Poor prognosis marker | 156     |
| COL1A2 | Poor prognosis marker | 157     |
| COL3A1 | Poor prognosis marker | 158     |
| CRNN   | Poor prognosis marker | 159     |
| ECM1   | Poor prognosis marker | 160,161 |
| EMP1   | Poor prognosis marker | 162     |
| ERO1A  | Poor prognosis marker | 163     |
| GLUL   | Poor prognosis marker | 164,165 |
| KLK13  | Poor prognosis marker | 166     |
| KLK6   | Poor prognosis marker | 167,168 |
| KLK7   | Poor prognosis marker | 168     |
| KRT13  | Poor prognosis marker | 169     |
| KRT4   | Poor prognosis marker | 170     |
| KRT78  | Poor prognosis marker | 171     |
| KRT8   | Poor prognosis marker | 171     |
| LCE3D  | Poor prognosis marker | 172,173 |
| NDRG1  | Poor prognosis marker | 174,175 |
| PRSS27 | Poor prognosis marker | 176     |
| SOD2   | Poor prognosis marker | 91,92   |
| SPRR2A | Poor prognosis marker | 177,178 |
| SPRR2D | Poor prognosis marker | 178     |
| SPRR3  | Poor prognosis marker | 179     |



|        |                                                                                  |         |
|--------|----------------------------------------------------------------------------------|---------|
| HOPX   | Tumor suppressor                                                                 | 180,181 |
| MAL    | Tumor suppressor                                                                 | 182     |
| SLURP1 | Tumor suppressor                                                                 | 183,184 |
| SLURP2 | Tumor suppressor                                                                 | 183     |
| SPINK5 | Tumor suppressor                                                                 | 185     |
| SPINK7 | Tumor suppressor                                                                 | 186     |
| TGM3   | Tumor suppressor                                                                 | 187,188 |
| TM4SF1 | Tumor suppressor (gastric carcinoma); poor prognosis marker (epithelial cancers) | 189,190 |

Supplementary table 4. **Identified clinical and preclinical targets.**

| Gene          | Drug name               | Company name                 | Indication                                                                                                                                                                                                                                                                                                                                                                    | Development Stage |
|---------------|-------------------------|------------------------------|-------------------------------------------------------------------------------------------------------------------------------------------------------------------------------------------------------------------------------------------------------------------------------------------------------------------------------------------------------------------------------|-------------------|
| CA9<br>47,191 | SLC-0111                | SignalChem Lifesciences Corp | Pancreatic Ductal Adenocarcinoma                                                                                                                                                                                                                                                                                                                                              | Phase II          |
| DUT<br>192    | TAS-114                 | Taiho Pharmaceutical Co Ltd  | Adenocarcinoma Of The Gastroesophageal Junction; Gastric Cancer; Non-Small Cell Lung Cancer                                                                                                                                                                                                                                                                                   | Phase II          |
|               |                         |                              | Metastatic Breast Cancer; Metastatic Colorectal Cancer; Pancreatic Cancer                                                                                                                                                                                                                                                                                                     | Phase I           |
| EGFR<br>193   | futuximab + modotuximab | Symphogen A/S                | Metastatic Colorectal Cancer                                                                                                                                                                                                                                                                                                                                                  | Phase III         |
|               | abivertinib maleate     | Sorrento Therapeutics Inc    | Metastatic Hormone Refractory (Castration Resistant, Androgen-Independent) Prostate Cancer; Burkitt Lymphoma; Diffuse Large B-Cell Lymphoma; Follicular Lymphoma; Mantle Cell Lymphoma; Marginal Zone B-cell Lymphoma; Refractory Chronic Lymphocytic Leukemia (CLL); Relapsed Chronic Lymphocytic Leukemia (CLL); Waldenstrom Macroglobulinemia (Lymphoplasmacytic Lymphoma) | Phase I           |
|               | abivertinib maleate     | Sorrento Therapeutics Inc    | Hairy Cell Leukemia; Non-Small Cell Lung Cancer; Prostate Cancer                                                                                                                                                                                                                                                                                                              | Phase II          |

|  |                     |                                                  |                                                                                                                                                                                                                                                                          |           |
|--|---------------------|--------------------------------------------------|--------------------------------------------------------------------------------------------------------------------------------------------------------------------------------------------------------------------------------------------------------------------------|-----------|
|  | abivertinib maleate | Sorrento Therapeutics Inc                        | Non-Small Cell Lung Cancer                                                                                                                                                                                                                                               | Phase III |
|  | afatinib dimaleate  | More than 10 companies                           | Non-Small Cell Lung Cancer; Squamous Non-Small Cell Lung Cancer                                                                                                                                                                                                          | Marketed  |
|  |                     | Boehringer Ingelheim International GmbH          | Anaplastic Astrocytoma; Anaplastic Oligoastrocytoma; Chordoma; Leptomeningeal Disease (Neoplastic Meningitis, Leptomeningeal Carcinomatosis); Low-Grade Glioma; Medulloblastoma; Meningioma; Oligodendroglioma; Pituitary Tumor; Recurrent Glioblastoma Multiforme (GBM) | Phase I   |
|  |                     |                                                  | Chordoma; Esophageal Cancer; Gastric Cancer; Metastatic Transitional (Urothelial) Tract Cancer; Squamous Cell Carcinoma; Uterine Cancer; Lymphoma; Refractory Multiple Myeloma                                                                                           | Phase II  |
|  | alflutinib mesylate | Allist Shanghai Pharmaceutical Technology Co Ltd | Non-Small Cell Lung Cancer                                                                                                                                                                                                                                               | Marketed  |
|  |                     |                                                  | Lung Adenocarcinoma                                                                                                                                                                                                                                                      | Phase I   |
|  |                     | Arrivent Biopharma Inc                           | Non-Small Cell Lung Cancer                                                                                                                                                                                                                                               | Phase II  |
|  | amelimumab          | Shanghai Sailun Biotechnology Co Ltd             | Colorectal Cancer                                                                                                                                                                                                                                                        | Phase II  |
|  |                     | Janssen Inc                                      | Non-Small Cell Lung Cancer                                                                                                                                                                                                                                               | Marketed  |
|  |                     | Janssen-Cilag Pharma GmbH                        | Non-Small Cell Lung Cancer                                                                                                                                                                                                                                               | Marketed  |

|  |                       |                                            |                                                                                                                                                                                                                                                                                                   |           |
|--|-----------------------|--------------------------------------------|---------------------------------------------------------------------------------------------------------------------------------------------------------------------------------------------------------------------------------------------------------------------------------------------------|-----------|
|  |                       | Johnson & Johnson                          | Breast Cancer; Colorectal Cancer; Gastroesophageal (GE) Junction Carcinomas; Head and Neck Cancer Squamous Cell Carcinoma; Hepatocellular Carcinoma; Kidney Cancer (Renal Cell Cancer); Malignant Mesothelioma; Medullary Thyroid Cancer; Non-Small Cell Lung Cancer; Ovarian Cancer; Solid Tumor | Phase I   |
|  |                       |                                            | Esophageal Cancer; Gastric Cancer; Gastroesophageal (GE) Junction Carcinomas; Metastatic Colorectal Cancer                                                                                                                                                                                        | Phase II  |
|  |                       |                                            | Non-Small Cell Lung Cancer                                                                                                                                                                                                                                                                        | Phase III |
|  | AMX-3009              | Arromax Pharmatech Co Ltd                  | Solid Tumor                                                                                                                                                                                                                                                                                       | Phase I   |
|  | ASK-120067            | Jiangsu Aosaikang Pharmaceutical Co Ltd    | Non-Small Cell Lung Cancer                                                                                                                                                                                                                                                                        | Phase III |
|  | aumolertinib mesylate | Jiangsu Hansoh Pharmaceutical Group Co Ltd | Non-Small Cell Lung Cancer                                                                                                                                                                                                                                                                        | Marketed  |
|  |                       | EQRx Inc                                   | Non-Small Cell Lung Cancer                                                                                                                                                                                                                                                                        | Phase III |
|  |                       | Jiangsu Hansoh Pharmaceutical Group Co Ltd | Non-Small Cell Lung Cancer                                                                                                                                                                                                                                                                        | Phase III |
|  | BAY-2927088           | Bayer AG                                   | Non-Small Cell Lung Cancer                                                                                                                                                                                                                                                                        | Phase I   |

|                     |                                                |                                                                                                                                                                                                                                                                                   |           |
|---------------------|------------------------------------------------|-----------------------------------------------------------------------------------------------------------------------------------------------------------------------------------------------------------------------------------------------------------------------------------|-----------|
| BBT-176             | Bridge Biotherapeutics Inc                     | Non-Small Cell Lung Cancer                                                                                                                                                                                                                                                        | Phase II  |
| BC-001              | Dragonboat Biopharmaceutical (Shanghai) Co Ltd | Unspecified Cancer                                                                                                                                                                                                                                                                | Phase III |
| BCA-101             | Bicara Therapeutics Inc                        | Anal Cancer; Anaplastic Thyroid Cancer; Colorectal Cancer; Epithelial Ovarian Cancer; Gastric Cancer; Glioblastoma Multiforme (GBM); Head and Neck Cancer Squamous Cell Carcinoma; Hepatocellular Carcinoma; Lung Cancer; Pancreatic Cancer; Solid Tumor; Squamous Cell Carcinoma | Phase II  |
| BDTX-1535           | Black Diamond Therapeutics Inc                 | Glioblastoma Multiforme (GBM); Non-Small Cell Lung Cancer                                                                                                                                                                                                                         | Phase I   |
| BEBT-109            | Guangzhou BeBetter Medicine Technology Co Ltd  | Non-Small Cell Lung Cancer                                                                                                                                                                                                                                                        | Phase II  |
| befortinib mesylate | InventisBio Co Ltd                             | Non-Small Cell Lung Cancer                                                                                                                                                                                                                                                        | Phase III |
| BLU-451             | Blueprint Medicines Corp                       | Non-Small Cell Lung Cancer                                                                                                                                                                                                                                                        | Phase II  |
| BLU-701             | Zai Lab Ltd                                    | Non-Small Cell Lung Cancer                                                                                                                                                                                                                                                        | Phase II  |
| BLU-945             | Blueprint Medicines Corp                       | Non-Small Cell Lung Cancer                                                                                                                                                                                                                                                        | Phase II  |

|  |                                       |                                                                      |                                                                                             |           |
|--|---------------------------------------|----------------------------------------------------------------------|---------------------------------------------------------------------------------------------|-----------|
|  | BPI-361175                            | Betta Pharmaceuticals Co Ltd                                         | Non-Small Cell Lung Cancer; Solid Tumor                                                     | Phase II  |
|  | BPI-7711                              | Beta Pharma Inc                                                      | Non-Small Cell Lung Cancer                                                                  | Phase II  |
|  | C-005                                 | Wuxi Shuangliang Biotechnology Co Ltd                                | Non-Small Cell Lung Cancer                                                                  | Phase I   |
|  | cetuximab                             | Eli Lilly Canada Inc; Merck; Bristol-Myers Squibb KK; PT. Merck Tbk; | Head And Neck Cancer Squamous Cell Carcinoma; Metastatic Colorectal Cancer                  | Marketed  |
|  |                                       | Merck                                                                | Metastatic Colorectal Cancer                                                                | Phase I   |
|  |                                       | TheraOp gGmbH                                                        | Metastatic Colorectal Cancer                                                                | Phase II  |
|  |                                       | Eli Lilly and Co                                                     | Anal Cancer                                                                                 | Phase II  |
|  |                                       | Merck                                                                | Recurrent Head and Neck Cancer Squamous Cell Carcinoma; Squamous Non-Small Cell Lung Cancer | Phase II  |
|  | cetuximab + cobimetinib + palbociclib | Cothra Bioscience Pty Ltd                                            | Metastatic Colorectal Cancer                                                                | Phase II  |
|  |                                       | Mabpharm Ltd                                                         | Metastatic Colorectal Cancer                                                                | Phase III |

|                                                                                  |                                                                                                   |                                                                                                                                                                                                              |           |
|----------------------------------------------------------------------------------|---------------------------------------------------------------------------------------------------|--------------------------------------------------------------------------------------------------------------------------------------------------------------------------------------------------------------|-----------|
| cetuximab<br>biobetter                                                           | Dragonboat<br>Biopharmaceutical<br>(Shanghai) Co Ltd;<br>Shanghai Jing Ze<br>Biotechnology Co Ltd | Cervical Cancer; Colorectal Cancer; Endometrial Cancer; Esophageal Squamous Cell Carcinoma (ESCC); Head and Neck Cancer Squamous Cell Carcinoma; Metastatic Colorectal Cancer; Ovarian Cancer; Penile Cancer | Phase I   |
|                                                                                  | Enzene Biosciences<br>Ltd                                                                         | Head And Neck Cancer Squamous Cell Carcinoma; Lip Cancer; Locally Recurrent or Locoregional Solid Malignancies; Oral Cavity (Mouth) Cancer; Pharyngeal Neoplasm                                              | Phase III |
|                                                                                  | Ampo Biotechnology<br>Inc; Cinnagen Co;<br>Sichuan Kelun<br>Pharmaceutical Co<br>Ltd; 3SBio Inc   | Metastatic Colorectal Cancer                                                                                                                                                                                 | Phase III |
|                                                                                  | R-Pharm                                                                                           | Recurrent Head and Neck Cancer Squamous Cell Carcinoma                                                                                                                                                       | Phase III |
| dabrafenib<br>mesylate +<br>panitumumab +<br>trametinib<br>dimethyl<br>sulfoxide | Novartis AG                                                                                       | Metastatic Colorectal Cancer                                                                                                                                                                                 | Phase II  |
| dacomitinib                                                                      | Pfizer                                                                                            | Non-Small Cell Lung Cancer                                                                                                                                                                                   | Marketed  |
|                                                                                  |                                                                                                   | Human Epidermal Growth Factor Receptor 2 Positive Breast Cancer (HER2+ Breast Cancer); Ovarian Cancer; Triple-Negative Breast Cancer (TNBC)                                                                  | Phase I   |

|  |                         |                                           |                                                                                                                                                                                         |          |
|--|-------------------------|-------------------------------------------|-----------------------------------------------------------------------------------------------------------------------------------------------------------------------------------------|----------|
|  | DBPR-112                | AnBogen Therapeutics                      | Non-Small Cell Lung Cancer; Solid Tumor                                                                                                                                                 | Phase II |
|  | DF-203                  | Suzhou Dingfu Target Biotechnology Co Ltd | Colorectal Cancer; Head and Neck Cancer Squamous Cell Carcinoma; Non-Small Cell Lung Cancer; Pancreatic Cancer; Renal Cell Carcinoma; Solid Tumor; Triple-Negative Breast Cancer (TNBC) | Phase I  |
|  | doxitinib mesylate      | Henan Genuine Biotech Co Ltd              | Non-Small Cell Lung Cancer                                                                                                                                                              | Phase II |
|  | DZD-9008                | Dizal (Jiangsu) Pharmaceutical Co Ltd     | Solid Tumor; Non-Small Cell Lung Cancer                                                                                                                                                 | Phase II |
|  | EO-1001                 | Senz Oncology Pty Ltd                     | Unspecified Cancer                                                                                                                                                                      | Phase II |
|  |                         | Edison Oncology Holding Corp              | Breast Cancer; Central Nervous System (CNS) Cancer; Non-Small Cell Lung Cancer                                                                                                          | Phase II |
|  | epertinib               | Shionogi & Co Ltd                         | Breast Cancer; Malignant Neoplasms                                                                                                                                                      | Phase II |
|  |                         | EOC Pharma Ltd                            | Breast Cancer                                                                                                                                                                           | Phase II |
|  |                         | Hutchison MediPharma Ltd                  | Glioblastoma Multiforme (GBM)                                                                                                                                                           | Phase II |
|  | ERAS-801                | Erasca Inc                                | Recurrent Glioblastoma Multiforme (GBM)                                                                                                                                                 | Phase I  |
|  | erlotinib               | More than 15 companies                    | Metastatic Pancreatic Cancer; Non-Small Cell Lung Cancer                                                                                                                                | Marketed |
|  | erlotinib hydrochloride | More than 50 companies                    | Metastatic Pancreatic Cancer; Non-Small Cell Lung Cancer                                                                                                                                | Marketed |



|                                                                                                |                                                     |                                                                                                                                                              |           |
|------------------------------------------------------------------------------------------------|-----------------------------------------------------|--------------------------------------------------------------------------------------------------------------------------------------------------------------|-----------|
| ES-072                                                                                         | Zhejiang Bossan<br>Pharmaceutical Co Ltd            | Non-Small Cell Lung Cancer                                                                                                                                   | Phase I   |
| FCN-411                                                                                        | Fochon<br>Pharmaceutical Ltd                        | Head And Neck Cancer Squamous Cell Carcinoma                                                                                                                 | Phase I   |
|                                                                                                |                                                     | Non-Small Cell Lung Cancer                                                                                                                                   | Phase II  |
| FHND-9041                                                                                      | Jiangsu Zhengda<br>Fenghai<br>Pharmaceutical Co Ltd | Non-Small Cell Lung Cancer                                                                                                                                   | Phase III |
| Fusion Protein to<br>Antagonize EGFR<br>for Glioblastoma<br>Multiforme and<br>Malignant Glioma | Istari Oncology Inc                                 | Glioblastoma Multiforme (GBM); Malignant Glioma                                                                                                              | Phase II  |
| FWD-1509                                                                                       | Shenzhen Forward<br>Pharmaceutical Co Ltd           | Non-Small Cell Lung Cancer                                                                                                                                   | Phase II  |
| GB-263                                                                                         | Genor BioPharma Co<br>Ltd                           | Non-Small Cell Lung Cancer; Solid Tumor; Esophageal Cancer; Gastric<br>Cancer; Head and Neck Cancer Squamous Cell Carcinoma; Metastatic<br>Colorectal Cancer | Phase II  |
| GC-1118A                                                                                       | GC Biopharma Corp                                   | Adenocarcinoma Of the Gastroesophageal Junction; Colon Cancer; Gastric<br>Cancer; Metastatic Colorectal Cancer; Solid Tumor                                  | Phase II  |
| gefitinib                                                                                      | AstraZeneca; Daiichi<br>Sankyo Espha Co Ltd         | Non-Small Cell Lung Cancer                                                                                                                                   | Marketed  |

|                        |                                               |                                                                                                                                                                                                                                                                                             |           |
|------------------------|-----------------------------------------------|---------------------------------------------------------------------------------------------------------------------------------------------------------------------------------------------------------------------------------------------------------------------------------------------|-----------|
| H-002                  | RedCloud Bio Inc                              | Non-Small Cell Lung Cancer                                                                                                                                                                                                                                                                  | Phase II  |
| HL-07                  | Hualan Biological Engineering Inc             | Metastatic Colorectal Cancer                                                                                                                                                                                                                                                                | Phase II  |
| HS-627                 | Zhejiang Hisun Pharmaceutical Co Ltd          | Triple-Negative Breast Cancer (TNBC)                                                                                                                                                                                                                                                        | Phase I   |
|                        |                                               | Human Epidermal Growth Factor Receptor 2 Positive Breast Cancer (HER2+ Breast Cancer)                                                                                                                                                                                                       | Phase III |
| icotinib hydrochloride | Betta Pharmaceuticals Co Ltd                  | Non-Small Cell Lung Cancer                                                                                                                                                                                                                                                                  | Marketed  |
| JMT-101                | CSPC Pharmaceutical Group Ltd                 | Esophageal Squamous Cell Carcinoma (ESCC); Metastatic Colorectal Cancer; Non-Small Cell Lung Cancer; Solid Tumor                                                                                                                                                                            | Phase I   |
|                        |                                               | Non-Small Cell Lung Cancer                                                                                                                                                                                                                                                                  | Phase II  |
| JS-111                 | Shanghai Junshi Bioscience Co Ltd             | Non-Small Cell Lung Cancer                                                                                                                                                                                                                                                                  | Phase II  |
| KBP-5209               | XuanZhu Biological Technology Co Ltd          | Breast Cancer; Carcinoma of Unknown Primary (Occult Primary Tumor/Cancer of Unknown Primary); Colorectal Cancer; Gallbladder Cancer; Gastric Cancer; Head and Neck Cancer; Non-Small Cell Lung Cancer; Ovarian Cancer; Pancreatic Cancer; Paranasal Sinus And Nasal Cavity Cancer; Sarcomas | Phase II  |
| lapatinib              | Lupin Pharmaceuticals Inc; Sayre Therapeutics | Human Epidermal Growth Factor Receptor 2 Positive Breast Cancer (HER2+ Breast Cancer)                                                                                                                                                                                                       | Marketed  |

|                      |                                                                      |                                                                                                                                                                                      |           |
|----------------------|----------------------------------------------------------------------|--------------------------------------------------------------------------------------------------------------------------------------------------------------------------------------|-----------|
| lapatinib ditosylate | Zhuhai Rundu Pharmaceutical Co Ltd; Hetero Healthcare Ltd; Cipla Ltd | Human Epidermal Growth Factor Receptor 2 Positive Breast Cancer (HER2+ Breast Cancer)                                                                                                | Marketed  |
| larotininib          | HEC Pharma Co Ltd                                                    | Esophageal Squamous Cell Carcinoma (ESCC)                                                                                                                                            | Phase III |
|                      | Yuhan Corp                                                           | Non-Small Cell Lung Cancer                                                                                                                                                           | Marketed  |
|                      | Genosco Inc                                                          | Metastatic Brain Tumor                                                                                                                                                               | Phase II  |
|                      | Johnson & Johnson; Genosco Inc                                       | Non-Small Cell Lung Cancer                                                                                                                                                           | Phase III |
| lifirafenib maleate  | BeiGene Ltd                                                          | Colorectal Cancer; Endometrial Cancer; Non-Small Cell Lung Cancer; Ovarian Cancer; Pancreatic Cancer; Cholangiocarcinoma; Melanoma; Papillary Thyroid Cancer;                        | Phase II  |
| LL-191               | Nalo Therapeutics Inc                                                | Non-Small Cell Lung Cancer                                                                                                                                                           | Phase I   |
| MCLA-129             | Merus NV; Betta Pharmaceuticals Co Ltd                               | Adenocarcinoma Of the Gastroesophageal Junction; Esophageal Squamous Cell Carcinoma (ESCC); Gastric Cancer; Head And Neck Cancer Squamous Cell Carcinoma; Non-Small Cell Lung Cancer | Phase II  |
| MET-306              | Huadong Medicine Co Ltd                                              | Non-Small Cell Lung Cancer                                                                                                                                                           | Phase III |
| mobocertininib       |                                                                      | Non-Small Cell Lung Cancer                                                                                                                                                           | Marketed  |

|  |                        |                                                |                                                                                                                                               |           |
|--|------------------------|------------------------------------------------|-----------------------------------------------------------------------------------------------------------------------------------------------|-----------|
|  |                        | Takeda<br>Pharmaceuticals<br>Australia Pty Ltd | Bladder Cancer; Breast Cancer; Esophageal Cancer; Gastric Cancer; Head and Neck Cancer; Metastatic Biliary Tract Cancer; Urinary Tract Cancer | Phase II  |
|  |                        |                                                | Non-Small Cell Lung Cancer                                                                                                                    | Phase III |
|  | MVC-101                | Maverick Therapeutics<br>Inc                   | Colorectal Cancer; Head and Neck Cancer Squamous Cell Carcinoma; Non-Small Cell Lung Cancer; Pancreatic Cancer; Solid Tumor                   | Phase II  |
|  | naquotinib<br>mesylate | Novartis AG                                    | Non-Small Cell Lung Cancer                                                                                                                    | Phase II  |
|  | necitumumab            | Nippon Kayaku Co Ltd;<br>Eli Lilly Canada Inc  | Squamous Non-Small Cell Lung Cancer                                                                                                           | Marketed  |
|  |                        |                                                | Nasopharyngeal Cancer                                                                                                                         | Marketed  |
|  |                        | Biotech<br>Pharmaceutical Co Ltd               | High-Grade Glioma                                                                                                                             | Marketed  |
|  |                        | PT Kalbe Farma Tbk                             |                                                                                                                                               |           |
|  |                        | Biocon Ltd                                     | Head And Neck Cancer Squamous Cell Carcinoma                                                                                                  | Marketed  |
|  |                        | Eurofarma<br>Laboratorios SA                   | Glioma; High-Grade Glioma; Pediatric Diffuse Intrinsic Pontine Glioma                                                                         | Marketed  |
|  |                        | Biotech<br>Pharmaceutical Co Ltd               | Recurrent Head and Neck Cancer Squamous Cell Carcinoma                                                                                        | Phase I   |
|  |                        | Biotech<br>Pharmaceutical Co Ltd               | Head And Neck Cancer Squamous Cell Carcinoma                                                                                                  | Phase II  |

|  |                            |                                                                                                                |                                                                                                                                                         |           |
|--|----------------------------|----------------------------------------------------------------------------------------------------------------|---------------------------------------------------------------------------------------------------------------------------------------------------------|-----------|
|  |                            | InnoMab Pte Ltd                                                                                                | Cervical Cancer                                                                                                                                         | Phase III |
|  |                            | Biotech<br>Pharmaceutical Co Ltd                                                                               | Pediatric Diffuse Intrinsic Pontine Glioma                                                                                                              | Phase III |
|  | NRC-2694                   | Natco Pharma Ltd                                                                                               | Hypopharyngeal Cancer; Laryngeal Cancer; Oral Cavity (Mouth) Cancer;<br>Oropharyngeal Cancer; Recurrent Head and Neck Cancer Squamous Cell<br>Carcinoma | Phase II  |
|  | olafertinib                | Checkpoint<br>Therapeutics Inc;<br>Suzhou Neupharma Co<br>Ltd                                                  | Non-Small Cell Lung Cancer                                                                                                                              | Phase II  |
|  | olmutinib<br>hydrochloride | Hanmi<br>Pharmaceuticals Co<br>Ltd                                                                             | Non-Small Cell Lung Cancer                                                                                                                              | Marketed  |
|  | osimertinib<br>mesylate    | AstraZeneca                                                                                                    | Non-Small Cell Lung Cancer                                                                                                                              | Marketed  |
|  | panitumumab                | Amgen; PT Glaxo<br>Wellcome; Takeda<br>Pharmaceutical Co<br>Ltd; Amgen Inc; Dr.<br>Reddy's Laboratories<br>Ltd | Metastatic Colorectal Cancer                                                                                                                            | Marketed  |

|  |                          |                                 |                                                                                                                                                                                                |           |
|--|--------------------------|---------------------------------|------------------------------------------------------------------------------------------------------------------------------------------------------------------------------------------------|-----------|
|  | PB-357                   | Puma Biotechnology Inc          | Breast Cancer                                                                                                                                                                                  | Phase I   |
|  | petosemtamab             | Merus NV                        | Metastatic Colorectal Cancer; Solid Tumor                                                                                                                                                      | Phase II  |
|  | poziotinib hydrochloride | Hanmi Pharmaceuticals Co Ltd    | Esophageal Cancer                                                                                                                                                                              | Phase I   |
|  |                          |                                 | Human Epidermal Growth Factor Receptor 2 Positive Breast Cancer (HER2+ Breast Cancer); Lung Adenocarcinoma                                                                                     | Phase II  |
|  |                          |                                 | Non-Small Cell Lung Cancer                                                                                                                                                                     | Phase III |
|  | pyrotinib                | Jiangsu Hengrui Medicine Co Ltd | Human Epidermal Growth Factor Receptor 2 Positive Breast Cancer (HER2+ Breast Cancer)                                                                                                          | Marketed  |
|  | QL-1105                  | Qilu Pharmaceutical Co Ltd      | Colorectal Cancer; Head and Neck Cancer                                                                                                                                                        | Phase I   |
|  | QL-1203                  | Qilu Pharmaceutical Co Ltd      | Metastatic Colorectal Cancer                                                                                                                                                                   | Phase III |
|  | RXDX-105                 | F. Hoffmann-La Roche Ltd        | Leptomeningeal Disease (Neoplastic Meningitis, Leptomeningeal Carcinomatosis); Lung Adenocarcinoma; Medullary Thyroid Cancer; Ovarian Cancer; Solid Tumor; Squamous Non-Small Cell Lung Cancer | Phase I   |
|  | sapitinib                | AstraZeneca Plc                 | Metastatic Colorectal Cancer                                                                                                                                                                   | Phase III |
|  | SCT-200                  | SinoCelltech Group Ltd          | Colorectal Cancer                                                                                                                                                                              | Phase I   |
|  |                          |                                 | Recurrent Head and Neck Cancer Squamous Cell Carcinoma                                                                                                                                         | Phase II  |

|  |                      |                                      |                                                                                                                                                                                 |           |
|--|----------------------|--------------------------------------|---------------------------------------------------------------------------------------------------------------------------------------------------------------------------------|-----------|
|  |                      |                                      | Esophageal Squamous Cell Carcinoma (ESCC); Metastatic Colorectal Cancer; Triple-Negative Breast Cancer (TNBC)                                                                   | Phase II  |
|  | selatinib ditosilate | Qilu Pharmaceutical Co Ltd           | Breast Cancer                                                                                                                                                                   | Phase I   |
|  | sirotinib            | XuanZhu Biological Technology Co Ltd | Esophageal Squamous Cell Carcinoma (ESCC); Gastric Cancer; Lung Cancer                                                                                                          | Phase I   |
|  | SKLB-1028            | CSPC Pharmaceutical Group Ltd        | Acute Myelocytic Leukemia (AML, Acute Myeloblastic Leukemia)                                                                                                                    | Phase II  |
|  |                      |                                      | Refractory Acute Myeloid Leukemia; Relapsed Acute Myeloid Leukemia                                                                                                              | Phase III |
|  | SPH-118811           | Shanghai Pharmaceutical Group Co Ltd | Non-Small Cell Lung Cancer                                                                                                                                                      | Phase I   |
|  | Sutetinib maleate    | Suzhou Teligene Ltd                  | Non-Small Cell Lung Cancer                                                                                                                                                      | Phase II  |
|  | SYHA-12128           | CSPC Pharmaceutical Group Ltd        | Adenocarcinoma Of the Gastroesophageal Junction; Colorectal Cancer; Gastric Cancer                                                                                              | Phase I   |
|  |                      |                                      | Bile Duct Cancer (Cholangiocarcinoma); Extrahepatic Bile Duct Cancer; Gallbladder Cancer; Metastatic Biliary Tract Cancer; Medullary Thyroid Cancer; Non-Small Cell Lung Cancer | Phase II  |
|  | SYN-004              | Synermore Biologics Co Ltd           | Head And Neck Cancer Squamous Cell Carcinoma; Metastatic Colorectal Cancer; Non-Small Cell Lung Cancer; Solid Tumor                                                             | Phase I   |

|                      |                                                                                |                                                                                                                                                                                                              |          |
|----------------------|--------------------------------------------------------------------------------|--------------------------------------------------------------------------------------------------------------------------------------------------------------------------------------------------------------|----------|
| TAS-2940             | Taiho Oncology Inc                                                             | Glioblastoma Multiforme (GBM); Human Epidermal Growth Factor Receptor 2 Positive Breast Cancer (HER2+ Breast Cancer); Non-Small Cell Lung Cancer                                                             | Phase I  |
| tesevatinib tosylate | Kadmon Holdings Inc                                                            | Leptomeningeal Disease (Neoplastic Meningitis, Leptomeningeal Carcinomatosis); Metastatic Brain Tumor; Recurrent Glioblastoma Multiforme (GBM); Non-Small Cell Lung Cancer                                   | Phase II |
| tomuzotuximab        | Glycotope GmbH                                                                 | Breast Cancer; Esophageal Cancer; Gastric Cancer; Gynecological Cancer; Kidney Cancer (Renal Cell Cancer); Metastatic Colorectal Cancer; Non-Small Cell Lung Cancer                                          | Phase I  |
|                      |                                                                                | Recurrent Head and Neck Cancer Squamous Cell Carcinoma                                                                                                                                                       | Phase II |
| TQB-3804             | Chia Tai Tianqing Pharmaceutical Group Co Ltd                                  | Malignant Neoplasms                                                                                                                                                                                          | Phase I  |
| Vaccine              | Center of Molecular Immunology                                                 | Hormone Refractory (Castration Resistant, Androgen-Independent) Prostate Cancer                                                                                                                              | Phase I  |
| vandetanib           | Sanofi-Aventis (Suisse); Medley Industria Farmaceutica Ltda; Genzyme Europe BV | Medullary Thyroid Cancer                                                                                                                                                                                     | Marketed |
| varlitinib           | Aslan Pharmaceuticals Ltd                                                      | Bladder Cancer; Breast Cancer; Colorectal Cancer; Gastrointestinal Tumor; Glioblastoma Multiforme (GBM); Head and Neck Cancer Squamous Cell Carcinoma; Hepatobiliary System Tumor; Metastatic Hepatocellular | Phase I  |



|  |              |                                                |                                                                                                                           |           |
|--|--------------|------------------------------------------------|---------------------------------------------------------------------------------------------------------------------------|-----------|
|  |              |                                                | Carcinoma (HCC); Non-Small Cell Lung Cancer; Ovarian Cancer; Pancreatic Cancer; Prostate Cancer                           |           |
|  |              |                                                | Gastric Cancer; Human Epidermal Growth Factor Receptor 2 Positive Breast Cancer (HER2+ Breast Cancer); Gallbladder Cancer | Phase II  |
|  |              |                                                | Gastroesophageal (GE) Junction Carcinomas; Cholangiocarcinoma                                                             | Phase III |
|  |              |                                                | Papillary Thyroid Cancer; Solid Tumor                                                                                     | Phase III |
|  | VRN-07       | Voronoi Group                                  | Solid Tumor                                                                                                               | Phase I   |
|  | WJ-13404     | Wigen Biomedicine Technology (Shanghai) Co Ltd | Non-Small Cell Lung Cancer                                                                                                | Phase II  |
|  | WSD-0922     | Wayshine Biopharma Inc                         | Non-Small Cell Lung Cancer; Anaplastic Astrocytoma; Glioblastoma Multiforme (GBM)                                         | Phase I   |
|  | XZP-5809     | Sihuan Pharmaceutical Holdings Group Ltd       | Non-Small Cell Lung Cancer                                                                                                | Phase I   |
|  | ynlitinib    | HEC Pharma Co Ltd                              | Breast Cancer                                                                                                             | Phase I   |
|  | YZJ-0318     | Yangtze River Pharmaceutical Group             | Non-Small Cell Lung Cancer                                                                                                | Phase I   |
|  | zipalertinib | Taiho Pharmaceutical Co Ltd; Zai Lab Ltd       | Non-Small Cell Lung Cancer                                                                                                | Phase II  |

|                      |                            |                                               |                                                                                                                                                              |           |
|----------------------|----------------------------|-----------------------------------------------|--------------------------------------------------------------------------------------------------------------------------------------------------------------|-----------|
|                      | ZNE-4                      | Zentalis Pharmaceuticals Inc                  | Non-Small Cell Lung Cancer                                                                                                                                   | Phase II  |
|                      | zorifertinib               | Alpha Biopharma Ltd                           | Non-Small Cell Lung Cancer                                                                                                                                   | Phase III |
| PGF <sup>116</sup>   | conbercept                 | Chengdu Kanghong Pharmaceuticals Group Co Ltd | Retinoblastoma                                                                                                                                               | Phase II  |
|                      | ziv-aflibercept            | Sanofi-Aventis                                | Metastatic Colorectal Cancer                                                                                                                                 | Marketed  |
|                      | ziv-aflibercept            | Regeneron Pharmaceuticals Inc                 | Uveal Melanoma                                                                                                                                               | Phase II  |
|                      | THR-317                    | Oncurious NV                                  | Medulloblastoma                                                                                                                                              | Phase II  |
|                      | ziv-aflibercept biosimilar | Luye Pharma Group Ltd                         | Metastatic Colorectal Cancer                                                                                                                                 | Phase II  |
| CXCL8 <sup>194</sup> | BMS-986253                 | Bristol-Myers Squibb Co                       | Head And Neck Cancer Squamous Cell Carcinoma; Hepatocellular Carcinoma; Hormone-Sensitive Prostate Cancer; Melanoma; Non-Small Cell Lung Cancer; Solid Tumor | Phase II  |
|                      |                            |                                               | Melanoma; Renal Cell Carcinoma                                                                                                                               | Phase I   |
| ITGA2 <sup>195</sup> | E-7820                     | Eisai Co Ltd                                  | Chronic Myelomonocytic Leukemia (CMML); Myelodysplastic Syndrome; Refractory Acute Myeloid Leukemia; Relapsed Acute Myeloid Leukemia                         | Phase II  |
| HK2 <sup>196</sup>   | tuvatexib                  | Vidac Pharma                                  | Cutaneous T-Cell Lymphoma                                                                                                                                    | Phase II  |

|                          |                       |                                                                                            |                                                                                                                                                                                                                                                                    |           |
|--------------------------|-----------------------|--------------------------------------------------------------------------------------------|--------------------------------------------------------------------------------------------------------------------------------------------------------------------------------------------------------------------------------------------------------------------|-----------|
| HMGB<br>1 <sup>197</sup> | dociparstat<br>sodium | Chimerix Inc                                                                               | Acute Myelocytic Leukemia (AML, Acute Myeloblastic Leukemia)                                                                                                                                                                                                       | Phase III |
| CLDN1<br>198             | ALEF-02               | Alentis Therapeutics<br>AG                                                                 | Solid Tumor                                                                                                                                                                                                                                                        | Phase I   |
| VEGFA<br>199             | ABL-001               | Compass Therapeutics<br>Inc                                                                | Extrahepatic Bile Duct Cancer; Gallbladder Cancer; Metastatic Biliary Tract<br>Cancer; Metastatic Colorectal Cancer                                                                                                                                                | Phase I   |
|                          |                       | Handok Inc;<br>Elpiscience Biopharma<br>Ltd                                                | Bile Duct Cancer (Cholangiocarcinoma); Extrahepatic Bile Duct Cancer;<br>Gallbladder Cancer; Gastric Cancer; Gastrointestinal Stromal Tumor (GIST);<br>Metastatic Colorectal Cancer; Non-Small Cell Lung Cancer; Ovarian Cancer;<br>Pancreatic Cancer; Solid Tumor | Phase II  |
|                          | bevacizumab           | Roche; Chugai<br>Pharmaceutical Co<br>Ltd; Genentech; Cipla;<br>PT Boehringer<br>Ingelheim | Cervical Cancer; Epithelial Ovarian Cancer; Fallopian Tube Cancer;<br>Metastatic Breast Cancer; Metastatic Colorectal Cancer; Metastatic Renal<br>Cell Carcinoma; Non-Small Cell Lung Cancer; Peritoneal Cancer                                                    | Marketed  |
|                          | bevacizumab           | Chugai Pharmaceutical<br>Co Ltd; F. Hoffmann-La<br>Roche Ltd                               | Hepatocellular Carcinoma; Human Epidermal Growth Factor Receptor 2<br>Negative Breast Cancer (HER2- Breast Cancer)                                                                                                                                                 | Phase II  |
|                          | bevacizumab           | Chugai Pharmaceutical<br>Co Ltd; F. Hoffmann-La<br>Roche Ltd                               | Cervical Cancer; Malignant Pleural Mesothelioma; Melanoma;<br>Hepatocellular Carcinoma; Metastatic Colorectal Cancer; Lung Cancer;<br>Human Epidermal Growth Factor Receptor 2 Negative Breast Cancer (HER2-<br>Breast Cancer)                                     | Phase III |

|      |                            |                                                                                                                                                                     |                                                                                                                                                                                                                                                                                                                                                                                                                                         |          |
|------|----------------------------|---------------------------------------------------------------------------------------------------------------------------------------------------------------------|-----------------------------------------------------------------------------------------------------------------------------------------------------------------------------------------------------------------------------------------------------------------------------------------------------------------------------------------------------------------------------------------------------------------------------------------|----------|
|      | bevacizumab + paclitaxel   | Sorrento Therapeutics Inc                                                                                                                                           | Adenocarcinoma; Cervical Cancer; Clear Cell Squamous Cell Carcinoma; Endometrial Cancer; Fallopian Tube Cancer; Melanoma; Ovarian Cancer; Peritoneal Cancer; Squamous Cell Carcinoma                                                                                                                                                                                                                                                    | Phase I  |
|      | bevacizumab biosimilar     | Pfizer; Amgen Inc; Daiichi Sankyo Co Ltd; PT Pyridam Farma Tbk; BeiGene Ltd; Cipla; Celltrion Inc; Eris Lifesciences Ltd; Biocad; Qilu Pharmaceutical Co Ltd; Merck | Epithelial Ovarian Cancer; Fallopian Tube Cancer; Glioblastoma Multiforme (GBM); Metastatic Colorectal Cancer; Non-Small Cell Lung Cancer; Peritoneal Cancer; Cervical Cancer; Fallopian Tube Cancer; Metastatic Breast Cancer; Metastatic Renal Cell Carcinoma; Peritoneal Cancer                                                                                                                                                      | Marketed |
|      | ziv-aflibercept            | Sanofi-Aventis                                                                                                                                                      | Metastatic Colorectal Cancer                                                                                                                                                                                                                                                                                                                                                                                                            | Marketed |
|      |                            | Regeneron Pharmaceuticals Inc                                                                                                                                       | Uveal Melanoma                                                                                                                                                                                                                                                                                                                                                                                                                          | Phase II |
|      | ziv-aflibercept biosimilar | Luye Pharma Group Ltd                                                                                                                                               | Metastatic Colorectal Cancer                                                                                                                                                                                                                                                                                                                                                                                                            | Phase II |
| TFRC | CX-2029                    | CytomX Therapeutics Inc                                                                                                                                             | Diffuse Large B-Cell Lymphoma; Squamous Non-Small Cell Lung Cancer.<br><br>Adenoid Cystic Carcinoma (ACC); Bladder Cancer; Colorectal Cancer; Esophageal Cancer; Gastroesophageal (GE) Junction Carcinomas; Head and Neck Cancer Squamous Cell Carcinoma; Hepatocellular Carcinoma; Kidney Cancer (Renal Cell Cancer); Malignant Pleural Mesothelioma; Ocular Melanoma; Ovarian Cancer; Pancreatic Cancer; Prostate Cancer; Soft Tissue | Phase II |

|                             |                 |                             |                                                                                                                                                                                                            |             |
|-----------------------------|-----------------|-----------------------------|------------------------------------------------------------------------------------------------------------------------------------------------------------------------------------------------------------|-------------|
|                             |                 |                             | Sarcoma; Solid Tumor; Thymic Carcinoma; Thymoma (Thymic Epithelial Tumor); Thyroid Cancer                                                                                                                  |             |
|                             | INA-03          | Inatherys                   | Acute Lymphocytic Leukemia (ALL, Acute Lymphoblastic Leukemia); Acute Myelocytic Leukemia (AML, Acute Myeloblastic Leukemia); Leukemia; Refractory Acute Myeloid Leukemia; Relapsed Acute Myeloid Leukemia | Phase I     |
|                             | JSTTFR-09       | Fujifilm Holdings Corp      | Polycythemia Vera                                                                                                                                                                                          | Phase I     |
| PFKFB<br>3 <sup>200</sup>   | KAN-0438757     | Kancera AB                  | Triple-Negative Breast Cancer (TNBC)                                                                                                                                                                       | Preclinical |
| CIB1<br>201-203             | Small Molecules | Reveris Therapeutics<br>LLC | Breast Cancer                                                                                                                                                                                              | Preclinical |
| HSP90<br>AA1 <sup>204</sup> | Small Molecule  | China Medical<br>University | Unspecified Cancer                                                                                                                                                                                         | Preclinical |

## Supplementary References

1. Shen A, Liu L, Huang Y, et al. Targeting Spindle-Associated Protein HAUS6 Prevents Cell Growth of Colorectal Cancer Cells by Activating the P53/P21 Pathway. 2020.
2. Hernandez P, Sole X, Valls J, et al. Integrative analysis of a cancer somatic mutome. *Mol Cancer* 2007;6:13.
3. Dart AE, Worth DC, Muir G, et al. The drebrin/EB3 pathway drives invasive activity in prostate cancer. *Oncogene* 2017;36:4111-23.
4. Yu Q, Tang F, Cao F, Tan X, Weng L, Sun L. Drebrin promotes lung adenocarcinoma cell migration through inducing integrin beta1 endocytosis. *Biochem Biophys Res Commun* 2022;630:175-82.
5. Muller D, Millon R, Theobald S, et al. Cyclin L1 (CCNL1) gene alterations in human head and neck squamous cell carcinoma. *Br J Cancer* 2006;94:1041-4.
6. Chuu C-P, Lin C-Y, Huang S-H, Tsai KK-C. ACTL6A is a novel oncogene and prognostic biomarker for prostate cancer. *Annals of Oncology* 2019;30:vi106.
7. Sykaras AG, Pergaris A, Theocharis S. Challenging, Accurate and Feasible: CAF-1 as a Tumor Proliferation Marker of Diagnostic and Prognostic Value. *Cancers (Basel)* 2021;13.
8. Camilo V, Henrique R. Oncogenic potential of CHAF1A in gastric cancer: A novel link with Helicobacter pylori-driven carcinogenesis? *EBioMedicine* 2018;38:3-4.
9. Ishida K, Nakashima T, Shibata T, Hara A, Tomita H. Role of the DEK oncogene in the development of squamous cell carcinoma. *Int J Clin Oncol* 2020;25:1563-9.
10. Fields AP, Justilien V. The guanine nucleotide exchange factor (GEF) Ect2 is an oncogene in human cancer. *Adv Enzyme Regul* 2010;50:190-200.
11. Qin A, Liu Q, Wang J. Ropivacaine inhibits proliferation, invasion, migration and promotes apoptosis of papillary thyroid cancer cells via regulating ITGA2 expression. *Drug Dev Res* 2020;81:700-7.
12. Rutkovsky AC, Yeh ES, Guest ST, et al. Eukaryotic initiation factor 4E-binding protein as an oncogene in breast cancer. *BMC Cancer* 2019;19:491.
13. Cao S, Zheng J, Liu X, et al. FXR1 promotes the malignant biological behavior of glioma cells via stabilizing MIR17HG. *J Exp Clin Cancer Res* 2019;38:37.
14. Lukey MJ, Greene KS, Erickson JW, Wilson KF, Cerione RA. The oncogenic transcription factor c-Jun regulates glutaminase expression and sensitizes cells to glutaminase-targeted therapy. *Nat Commun* 2016;7:11321.
15. Lee DH, Kim GW, Yoo J, et al. Histone demethylase KDM4C controls tumorigenesis of glioblastoma by epigenetically regulating p53 and c-Myc. *Cell Death Dis* 2021;12:89.
16. Qin H, Li Y, Zhang H, et al. Prognostic implications and oncogenic roles of MYBL2 protein expression in esophageal squamous-cell carcinoma. *Onco Targets Ther* 2019;12:1917-27.
17. Ahmadi SE, Rahimi S, Zarandi B, Chegeni R, Safa M. MYC: a multipurpose oncogene with prognostic and therapeutic implications in blood malignancies. *J Hematol Oncol* 2021;14:121.
18. Wang JJ, Zou JX, Wang H, et al. Histone methyltransferase NSD2 mediates the survival and invasion of triple-negative breast cancer cells via stimulating ADAM9-EGFR-AKT signaling. *Acta Pharmacol Sin* 2019;40:1067-75.
19. Liang J, Xia L, Oyang L, et al. The functions and mechanisms of prefoldin complex and prefoldin-subunits. *Cell Biosci* 2020;10:87.
20. Singh DK, Gholamalamdari O, Jadaliha M, et al. PSIP1/p75 promotes tumorigenicity in breast cancer cells by promoting the transcription of cell cycle genes. *Carcinogenesis* 2017;38:966-75.

21. Zhang D, Jiang Q, Ge X, et al. RHOV promotes lung adenocarcinoma cell growth and metastasis through JNK/c-Jun pathway. *Int J Biol Sci* 2021;17:2622-32.
22. Zhao Z, Lu L, Li W. TAGLN2 promotes the proliferation, invasion, migration and epithelial-mesenchymal transition of colorectal cancer cells by activating STAT3 signaling through ANXA2. *Oncol Lett* 2021;22:737.
23. Meng T, Liu L, Hao R, Chen S, Dong Y. Transgelin-2: A potential oncogenic factor. *Tumor Biol* 2017;39:1010428317702650.
24. Chen Y, Zhao H, Feng Y, et al. Pan-Cancer Analysis of the Associations of TGFBI Expression With Prognosis and Immune Characteristics. *Front Mol Biosci* 2021;8:745649.
25. Li L, Duan Q, Zeng Z, et al. UHRF2 promotes intestinal tumorigenesis through stabilization of TCF4 mediated Wnt/beta-catenin signaling. *Int J Cancer* 2020;147:2239-52.
26. Chen X, Chen SI, Liu XA, Zhou WB, Ma RR, Chen L. Vav3 oncogene is upregulated and a poor prognostic factor in breast cancer patients. *Oncol Lett* 2015;9:2143-8.
27. Aguilar H, Urruticoechea A, Halonen P, et al. VAV3 mediates resistance to breast cancer endocrine therapy. *Breast Cancer Res* 2014;16:R53.
28. Li D, Masiero M, Banham AH, Harris AL. The notch ligand JAGGED1 as a target for anti-tumor therapy. *Front Oncol* 2014;4:254.
29. Xiu MX, Liu YM, Kuang BH. The oncogenic role of Jagged1/Notch signaling in cancer. *Biomed Pharmacother* 2020;129:110416.
30. Wang L, Wang H, Yang C, et al. Investigating CENPW as a Novel Biomarker Correlated With the Development and Poor Prognosis of Breast Carcinoma. *Front Genet* 2022;13:900111.
31. Zhou Y, Chai H, Guo L, et al. Knockdown of CENPW Inhibits Hepatocellular Carcinoma Progression by Inactivating E2F Signaling. *Technol Cancer Res Treat* 2021;20:15330338211007253.
32. Ma RM, Yang F, Huang DP, Zheng M, Wang YL. The Prognostic Value of the Expression of SMC4 mRNA in Breast Cancer. *Dis Markers* 2019;2019:2183057.
33. Jiang L, Zhou J, Zhong D, et al. Overexpression of SMC4 activates TGFbeta/Smad signaling and promotes aggressive phenotype in glioma cells. *Oncogenesis* 2017;6:e301.
34. Martins VL, Vyas JJ, Chen M, et al. Increased invasive behaviour in cutaneous squamous cell carcinoma with loss of basement-membrane type VII collagen. *J Cell Sci* 2009;122:1788-99.
35. Nilchian A, Johansson J, Ghalali A, et al. CXADR-Mediated Formation of an AKT Inhibitory Signalosome at Tight Junctions Controls Epithelial-Mesenchymal Plasticity in Breast Cancer. *Cancer Res* 2019;79:47-60.
36. Nagy A, Pongor LS, Szabo A, Santarpia M, Gyorffy B. KRAS driven expression signature has prognostic power superior to mutation status in non-small cell lung cancer. *Int J Cancer* 2017;140:930-7.
37. Hayashi M, Okabe K, Yamawaki Y, et al. Loss of lysophosphatidic acid receptor-3 enhances cell migration in rat lung tumor cells. *Biochem Biophys Res Commun* 2011;405:450-4.
38. Liu X, Liu P, Chernock RD, et al. A prognostic gene expression signature for oropharyngeal squamous cell carcinoma. *EBioMedicine* 2020;61:102805.
39. Li D, Zhao W, Zhang X, Lv H, Li C, Sun L. NEFM DNA methylation correlates with immune infiltration and survival in breast cancer. *Clin Epigenetics* 2021;13:112.
40. Kim BK, Yoo HI, Lee AR, Choi K, Yoon SK. Decreased expression of VLDLR is inversely correlated with miR-200c in human colorectal cancer. *Mol Carcinog* 2017;56:1620-9.

41. He Y, Luo Y, Zhang D, et al. PGK1-mediated cancer progression and drug resistance. *Am J Cancer Res* 2019;9:2280-302.
42. Zhao J, Liu J, Wu N, et al. ANGPTL4 overexpression is associated with progression and poor prognosis in breast cancer. *Oncol Lett* 2020;20:2499-505.
43. Zhang J, Lan Z, Qiu G, et al. Over-expression of ANP32E is associated with poor prognosis of pancreatic cancer and promotes cell proliferation and migration through regulating beta-catenin. *BMC Cancer* 2020;20:1065.
44. Lek SM, Li K, Tan QX, et al. Pairing a prognostic target with potential therapeutic strategy for head and neck cancer. *Oral Oncol* 2020;111:105035.
45. Kiss Z, Mudryj M, Ghosh PM. Non-circadian aspects of BHLHE40 cellular function in cancer. *Genes Cancer* 2020;11:1-19.
46. Sethuraman A, Brown M, Krutilina R, et al. BHLHE40 confers a pro-survival and pro-metastatic phenotype to breast cancer cells by modulating HBEGF secretion. *Breast Cancer Res* 2018;20:117.
47. Mboge MY, McKenna R, Frost SC. Advances in Anti-Cancer Drug Development Targeting Carbonic Anhydrase IX and XII. *Top Anticancer Res* 2015;5:3-42.
48. Cao LQ, Wang YN, Liang M, Pan MZ. CALB1 enhances the interaction between p53 and MDM2, and inhibits the senescence of ovarian cancer cells. *Mol Med Rep* 2019;19:5097-104.
49. Wang Y, Liu P, Zhang Z, Wang J, Cheng Z, Fan C. Identification of CCT3 as a prognostic factor and correlates with cell survival and invasion of head and neck squamous cell carcinoma. *Biosci Rep* 2021;41.
50. Xu G, Bu S, Wang X, Zhang H, Ge H. Suppression of CCT3 inhibits the proliferation and migration in breast cancer cells. *Cancer Cell Int* 2020;20:218.
51. Dou L, Zhang X. Upregulation of CCT3 promotes cervical cancer progression through FN1. *Mol Med Rep* 2021;24.
52. de Freitas GPA, Geraldo LHM, Faria BM, et al. Centromere protein J is overexpressed in human glioblastoma and promotes cell proliferation and migration. *J Neurochem* 2022;162:501-13.
53. Sun L, Wang Y, Yuan H, et al. CPA4 is a Novel Diagnostic and Prognostic Marker for Human Non-Small-Cell Lung Cancer. *J Cancer* 2016;7:1197-204.
54. Zhang X, Zhang X, Mao T, et al. CSE1L, as a novel prognostic marker, promotes pancreatic cancer proliferation by regulating the AKT/mTOR signaling pathway. *J Cancer* 2021;12:2797-806.
55. Yang X, Wang J, Li WP, Jin ZJ, Liu XJ. Desmocollin 3 mediates follicle stimulating hormone-induced ovarian epithelial cancer cell proliferation by activating the EGFR/Akt signaling pathway. *Int J Clin Exp Pathol* 2015;8:6716-23.
56. Jung YS, Park JI. Wnt signaling in cancer: therapeutic targeting of Wnt signaling beyond beta-catenin and the destruction complex. *Exp Mol Med* 2020;52:183-91.
57. Lyu S, Lu J, Chen W, et al. High expression of eIF4A2 is associated with a poor prognosis in esophageal squamous cell carcinoma. *Oncol Lett* 2020;20:177.
58. Liu L, Cai L, Liu C, et al. Construction and Validation of a Novel Glycometabolism-Related Gene Signature Predicting Survival in Patients With Ovarian Cancer. *Front Genet* 2020;11:585259.
59. Li L, Fu LQ, Wang HJ, Yan ZL, Yu XC, Wang YY. FAT2 is a novel independent prognostic factor for the poor prognosis of gastric carcinoma. *Int J Clin Exp Pathol* 2017;10:11603-9.



60. Anuraga G, Tang WC, Phan NN, et al. Comprehensive Analysis of Prognostic and Genetic Signatures for General Transcription Factor III (GTF3) in Clinical Colorectal Cancer Patients Using Bioinformatics Approaches. *Curr Issues Mol Biol* 2021;43.
61. Liu C, Zhou X, Zeng H, Wu D, Liu L. HILPDA Is a Prognostic Biomarker and Correlates With Macrophage Infiltration in Pan-Cancer. *Front Oncol* 2021;11:597860.
62. Guan Y, Zhu X, Liang J, Wei M, Huang S, Pan X. Upregulation of HSPA1A/HSPA1B/HSPA7 and Downregulation of HSPA9 Were Related to Poor Survival in Colon Cancer. *Front Oncol* 2021;11:749673.
63. Chu S, Wen Q, Qing Z, et al. High expression of heat shock protein 10 correlates negatively with estrogen/progesterone receptor status and predicts poor prognosis in invasive ductal breast carcinoma. *Hum Pathol* 2017;61:173-80.
64. Fan G, Tu Y, Wu N, Xiao H. The expression profiles and prognostic values of HSPs family members in Head and neck cancer. *Cancer Cell Int* 2020;20:220.
65. Xiao F, Dai Y, Hu Y, Lu M, Dai Q. Expression profile analysis identifies IER3 to predict overall survival and promote lymph node metastasis in tongue cancer. *Cancer Cell Int* 2019;19:307.
66. Fang J, Wang H, Liu Y, Ding F, Ni Y, Shao S. High KRT8 expression promotes tumor progression and metastasis of gastric cancer. *Cancer Sci* 2017;108:178-86.
67. Gordon-Weeks A, Lim SY, Yuzhalin A, et al. Tumor-Derived Laminin alpha5 (LAMA5) Promotes Colorectal Liver Metastasis Growth, Branching Angiogenesis and Notch Pathway Inhibition. *Cancers (Basel)* 2019;11.
68. Galatenko VV, Maltseva DV, Galatenko AV, Rodin S, Tonevitsky AG. Cumulative prognostic power of laminin genes in colorectal cancer. *BMC Med Genomics* 2018;11:9.
69. Zhao T, Zhang Y, Ma X, et al. Elevated expression of LPCAT1 predicts a poor prognosis and is correlated with the tumor microenvironment in endometrial cancer. *Cancer Cell Int* 2021;21:269.
70. Tao M, Luo J, Gu T, et al. LPCAT1 reprogramming cholesterol metabolism promotes the progression of esophageal squamous cell carcinoma. *Cell Death Dis* 2021;12:845.
71. Yang W, Li J, Zhang M, et al. Elevated expression of the rhythm gene NFIL3 promotes the progression of TNBC by activating NF-kappaB signaling through suppression of NFKBIA transcription. *J Exp Clin Cancer Res* 2022;41:67.
72. Poodineh J, Sirati-Sabet M, Rajabibazl M, Ghasemian M, Mohammadi-Yeganeh S. Downregulation of NRARP exerts anti-tumor activities in the breast tumor cells depending on Wnt/beta-catenin-mediated signals: The role of miR-130a-3p. *Chem Biol Drug Des* 2022;100:334-45.
73. Zhang M, Qin Y, Zuo B, et al. Overexpression of NOTCH-regulated Ankyrin Repeat Protein is associated with papillary thyroid carcinoma progression. *PLoS One* 2017;12:e0167782.
74. Shi J, Li C, Wang H, Xiao B, Qiu W. NUP58 facilitates metastasis and epithelial-mesenchymal transition of lung adenocarcinoma via the GSK-3beta/Snail signaling pathway. *Am J Transl Res* 2019;11:393-405.
75. Yang Z, Wei B, Qiao A, et al. A novel EZH2/NXPH4/CDKN2A axis is involved in regulating the proliferation and migration of non-small cell lung cancer cells. *Biosci Biotechnol Biochem* 2022;86:340-50.
76. Tantiwetrueangdet A, Panvichian R, Sornmayura P, Leelaudomlipi S, Macoska JA. PCNA-associated factor (KIAA0101/PCLAF) overexpression and gene copy number alterations in hepatocellular carcinoma tissues. *BMC Cancer* 2021;21:295.
77. Shen J, Jin Z, Lv H, et al. PFKP is highly expressed in lung cancer and regulates glucose metabolism. *Cell Oncol (Dordr)* 2020;43:617-29.

78. Liu M, Chen S, Zhang A, Zheng Q, Fu J. PLAUR as a Potential Biomarker Associated with Immune Infiltration in Bladder Urothelial Carcinoma. *J Inflamm Res* 2021;14:4629-41.
79. Wang Z, Qi H, Zhang Y, Sun H, Dong J, Wang H. PLPP2: Potential therapeutic target of breast cancer in PLPP family. *Immunobiology* 2022;227:152298.
80. Xu Y, Wang J, Cai S, et al. PNCK depletion inhibits proliferation and induces apoptosis of human nasopharyngeal carcinoma cells in vitro and in vivo. *J Cancer* 2019;10:6925-32.
81. Lin YY, Wang CY, Phan NN, et al. PODXL2 maintains cellular stemness and promotes breast cancer development through the Rac1/Akt pathway. *Int J Med Sci* 2020;17:1639-51.
82. Zhao H, Lu G. Prognostic Implication and Immunological Role of PSMD2 in Lung Adenocarcinoma. *Front Genet* 2022;13:905581.
83. Chang WM, Lin YF, Su CY, et al. Parathyroid Hormone-Like Hormone is a Poor Prognosis Marker of Head and Neck Cancer and Promotes Cell Growth via RUNX2 Regulation. *Sci Rep* 2017;7:41131.
84. Weekes D, Noel E, Walker C, et al. PUM3 is a triple-negative breast cancer dependency gene that functions in replication fork restart and repair. *Cancer Research* 2018;78:3363-.
85. He ZY, Wu SG, Peng F, et al. Up-Regulation of RFC3 Promotes Triple Negative Breast Cancer Metastasis and is Associated With Poor Prognosis Via EMT. *Transl Oncol* 2017;10:1-9.
86. Zhang J, Wang L, Xie X. RFC4 promotes the progression and growth of Oral Tongue squamous cell carcinoma in vivo and vitro. *J Clin Lab Anal* 2021;35:e23761.
87. Li H, Zhou T, Zhang Y, Jiang H, Zhang J, Hua Z. RuvBL1 Maintains Resistance to TRAIL-Induced Apoptosis by Suppressing c-Jun/AP-1 Activity in Non-Small Cell Lung Cancer. *Front Oncol* 2021;11:679243.
88. Mou Y, Zhang L, Liu Z, Song X. Abundant expression of ferroptosis-related SAT1 is related to unfavorable outcome and immune cell infiltration in low-grade glioma. *BMC Cancer* 2022;22:215.
89. Min KW, Kim DH, Son BK, et al. High SLC2A1 expression associated with suppressing CD8 T cells and B cells promoted cancer survival in gastric cancer. *PLoS One* 2021;16:e0245075.
90. Alves CL, Elias D, Lyng MB, Bak M, Ditzel HJ. SNAI2 upregulation is associated with an aggressive phenotype in fulvestrant-resistant breast cancer cells and is an indicator of poor response to endocrine therapy in estrogen receptor-positive metastatic breast cancer. *Breast Cancer Res* 2018;20:60.
91. Jung CH, Kim EM, Song JY, Park JK, Um HD. Mitochondrial superoxide dismutase 2 mediates gamma-irradiation-induced cancer cell invasion. *Exp Mol Med* 2019;51:1-10.
92. Amano T, Chano T, Isono T, Kimura F, Kushima R, Murakami T. Abundance of mitochondrial superoxide dismutase is a negative predictive biomarker for endometriosis-associated ovarian cancers. *World J Surg Oncol* 2019;17:24.
93. Sun R, Jiang B, Qi H, et al. SOX4 contributes to the progression of cervical cancer and the resistance to the chemotherapeutic drug through ABCG2. *Cell Death Dis* 2015;6:e1990.
94. Lin C, Sun L, Huang S, Weng X, Wu Z. STC2 Is a Potential Prognostic Biomarker for Pancreatic Cancer and Promotes Migration and Invasion by Inducing Epithelial-Mesenchymal Transition. *Biomed Res Int* 2019;2019:8042489.
95. Zhang C, Chen S, Ma X, et al. Upregulation of STC2 in colorectal cancer and its clinicopathological significance. *Onco Targets Ther* 2019;12:1249-58.
96. Wang X, Xu X, Cai W, et al. TBL1XR1 mutation predicts poor outcome in primary testicular diffuse large B-cell lymphoma patients. *Biomark Res* 2020;8:10.

97. Lee YY, Wei YC, Tian YF, et al. Overexpression of Transcobalamin 1 is an Independent Negative Prognosticator in Rectal Cancers Receiving Concurrent Chemoradiotherapy. *J Cancer* 2017;8:1330-7.
98. Tang N, Cai X, Peng L, Liu H, Chen Y. TCP1 regulates Wnt7b/beta-catenin pathway through P53 to influence the proliferation and migration of hepatocellular carcinoma cells. *Signal Transduct Target Ther* 2020;5:169.
99. Yasui K, Okamoto H, Arii S, Inazawa J. Association of over-expressed TFDPI with progression of hepatocellular carcinomas. *J Hum Genet* 2003;48:609-13.
100. Liu J, Sun M, Sun Y, Li H. TMEM189 promotes breast cancer through inhibition of autophagy-regulated ferroptosis. *Biochem Biophys Res Commun* 2022;622:37-44.
101. Yu J, Qu L, Xia Y, et al. TMEM189 negatively regulates the stability of ULK1 protein and cell autophagy. *Cell Death Dis* 2022;13:316.
102. An J, Luo Z, An W, Cao D, Ma J, Liu Z. Identification of spliceosome components pivotal to breast cancer survival. *RNA Biol* 2021;18:833-42.
103. Zeng Z, Lei S, He Z, Chen T, Jiang J. YEATS2 is a target of HIF1alpha and promotes pancreatic cancer cell proliferation and migration. *J Cell Physiol* 2021;236:2087-98.
104. Chen J, Wang Z, Gao S, et al. Human drug efflux transporter ABCC5 confers acquired resistance to pemetrexed in breast cancer. *Cancer Cell Int* 2021;21:136.
105. Hong X, Michalski CW, Kong B, et al. ALCAM is associated with chemoresistance and tumor cell adhesion in pancreatic cancer. *J Surg Oncol* 2010;101:564-9.
106. Larrue C, Guiraud N, Mouchel PL, et al. Adrenomedullin-CALCRL axis controls relapse-initiating drug tolerant acute myeloid leukemia cells. *Nat Commun* 2021;12:422.
107. Huang Z, Zhang H, Xing C, et al. Identification and validation of CALCRL-associated prognostic genes in acute myeloid leukemia. *Gene* 2022;809:146009.
108. Nagler A, Vredevoogd DW, Alon M, et al. A genome-wide CRISPR screen identifies FBXO42 involvement in resistance toward MEK inhibition in NRAS-mutant melanoma. *Pigment Cell Melanoma Res* 2020;33:334-44.
109. Zhao L, Pan Y, Gang Y, et al. Identification of GAS1 as an epirubicin resistance-related gene in human gastric cancer cells with a partially randomized small interfering RNA library. *J Biol Chem* 2009;284:26273-85.
110. Kudo-Saito C, Miyamoto T, Imazeki H, Shoji H, Aoki K, Boku N. IL33 Is a Key Driver of Treatment Resistance of Cancer. *Cancer Res* 2020;80:1981-90.
111. Wang J, Da C, Su Y, Song R, Bai Z. MKNK2 enhances chemoresistance of ovarian cancer by suppressing autophagy via miR-125b. *Biochem Biophys Res Commun* 2021;556:31-8.
112. Zhao Z, Zhang G, Li W. MT2A Promotes Oxaliplatin Resistance in Colorectal Cancer Cells. *Cell Biochem Biophys* 2020;78:475-82.
113. Li WM, Ke HL, Kuo YH, et al. High MT2A Expression Predicts Worse Prognosis in Patients with Urothelial Carcinoma. *Oncology* 2022;100:485-97.
114. Chang H, Li B, Zhang X, Meng X. NCK1-AS1 promotes NCK1 expression to facilitate tumorigenesis and chemo-resistance in ovarian cancer. *Biochem Biophys Res Commun* 2020;522:292-9.
115. Zhao Y, He J, Li Y, Lv S, Cui H. NUSAP1 potentiates chemoresistance in glioblastoma through its SAP domain to stabilize ATR. *Signal Transduct Target Ther* 2020;5:44.
116. Aoki S, Inoue K, Klein S, et al. Placental growth factor promotes tumor desmoplasia and treatment resistance in intrahepatic cholangiocarcinoma. *Gut* 2022;71:185-93.
117. Sheng X, Li Y, Li Y, et al. PLOD2 contributes to drug resistance in laryngeal cancer by promoting cancer stem cell-like characteristics. *BMC Cancer* 2019;19:840.

118. Zhou Q, Perakis SO, Ulz P, et al. Cell-free DNA analysis reveals POLR1D-mediated resistance to bevacizumab in colorectal cancer. *Genome Med* 2020;12:20.
119. Narita K, Matsuda Y, Seike M, Naito Z, Gemma A, Ishiwata T. Nestin regulates proliferation, migration, invasion and stemness of lung adenocarcinoma. *Int J Oncol* 2014;44:1118-30.
120. Fan SH, Wang YY, Lu J, et al. CERS2 suppresses tumor cell invasion and is associated with decreased V-ATPase and MMP-2/MMP-9 activities in breast cancer. *J Cell Biochem* 2015;116:502-13.
121. Lulic L, Jakovcevic A, Manojlovic L, Dediol E, Banks L, Tomaic V. Human DLG1 and SCRIB Are Distinctly Regulated Independently of HPV-16 during the Progression of Oropharyngeal Squamous Cell Carcinomas: A Preliminary Analysis. *Cancers (Basel)* 2021;13.
122. Bandaru S, Zhou AX, Rouhi P, et al. Targeting filamin B induces tumor growth and metastasis via enhanced activity of matrix metalloproteinase-9 and secretion of VEGF-A. *Oncogenesis* 2014;3:e119.
123. Tamura RE, de Vasconcellos JF, Sarkar D, Libermann TA, Fisher PB, Zerbini LF. GADD45 proteins: central players in tumorigenesis. *Curr Mol Med* 2012;12:634-51.
124. Liu L, Liu H, Zhou Y, et al. HLTf suppresses the migration and invasion of colorectal cancer cells via TGFbeta/SMAD signaling in vitro. *Int J Oncol* 2018;53:2780-8.
125. Lee M, Venkitaraman AR. A cancer-associated mutation inactivates a region of the high-mobility group protein HMG20b essential for cytokinesis. *Cell Cycle* 2014;13:2554-63.
126. Lee CC, Lin JC, Hwang WL, et al. Macrophage-secreted interleukin-35 regulates cancer cell plasticity to facilitate metastatic colonization. *Nat Commun* 2018;9:3763.
127. Airoidi I, Cocco C, Giuliani N, et al. Constitutive expression of IL-12R beta 2 on human multiple myeloma cells delineates a novel therapeutic target. *Blood* 2008;112:750-9.
128. Li K, Wu JL, Qin B, et al. ILF3 is a substrate of SPOP for regulating serine biosynthesis in colorectal cancer. *Cell Res* 2020;30:163-78.
129. Xu HF, Huang TJ, Yang Q, et al. Candidate tumor suppressor gene IRF6 is involved in human breast cancer pathogenesis via modulating PI3K-regulatory subunit PIK3R2 expression. *Cancer Manag Res* 2019;11:5557-72.
130. Li D, Cheng P, Wang J, et al. IRF6 Is Directly Regulated by ZEB1 and ELF3, and Predicts a Favorable Prognosis in Gastric Cancer. *Front Oncol* 2019;9:220.
131. Wang Y, Wang G, Tan X, et al. MT1G serves as a tumor suppressor in hepatocellular carcinoma by interacting with p53. *Oncogenesis* 2019;8:67.
132. Liu Z, Ye Q, Wu L, et al. Metallothionein 1 family profiling identifies MT1X as a tumor suppressor involved in the progression and metastatic capacity of hepatocellular carcinoma. *Mol Carcinog* 2018;57:1435-44.
133. Sharma A, Mendonca J, Ying J, et al. The prostate metastasis suppressor gene NDRG1 differentially regulates cell motility and invasion. *Mol Oncol* 2017;11:655-69.
134. Ye J, Liang R, Bai T, et al. RBM38 plays a tumor-suppressor role via stabilizing the p53-mdm2 loop function in hepatocellular carcinoma. *J Exp Clin Cancer Res* 2018;37:212.
135. Jiaye Y, Sinan H, Minjie Y, et al. Rcl1 suppresses tumor progression of hepatocellular carcinoma: a comprehensive analysis of bioinformatics and in vitro experiments. *Cancer Cell Int* 2022;22:114.
136. Yu S, Gautam N, Quan M, Gao Y. RSRC1 suppresses gastric cancer cell proliferation and migration by regulating PTEN expression. *Mol Med Rep* 2019;20:1747-53.
137. Jian H, Zhao Y, Liu B, Lu S. SEMA4B inhibits growth of non-small cell lung cancer in vitro and in vivo. *Cell Signal* 2015;27:1208-13.

138. Ding F, Gao F, Zhang S, Lv X, Chen Y, Liu Q. A review of the mechanism of DDIT4 serve as a mitochondrial related protein in tumor regulation. *Sci Prog* 2021;104:36850421997273.
139. Ho KH, Chen PH, Chou CM, et al. A Key Role of DNA Damage-Inducible Transcript 4 (DDIT4) Connects Autophagy and GLUT3-Mediated Stemness To Desensitize Temozolomide Efficacy in Glioblastomas. *Neurotherapeutics* 2020;17:1212-27.
140. Hao Y, Li G. Role of EFNA1 in tumorigenesis and prospects for cancer therapy. *Biomed Pharmacother* 2020;130:110567.
141. Cadranel J, Liu SV, Duruisseaux M, et al. Therapeutic Potential of Afatinib in NRG1 Fusion-Driven Solid Tumors: A Case Series. *Oncologist* 2021;26:7-16.
142. Durinikova E, Kozovska Z, Poturnajova M, et al. ALDH1A3 upregulation and spontaneous metastasis formation is associated with acquired chemoresistance in colorectal cancer cells. *BMC Cancer* 2018;18:848.
143. Gelardi ELM, Colombo G, Picarazzi F, et al. A Selective Competitive Inhibitor of Aldehyde Dehydrogenase 1A3 Hinders Cancer Cell Growth, Invasiveness and Stemness In Vitro. *Cancers (Basel)* 2021;13.
144. Hubert P, Roncarati P, Demoulin S, et al. Extracellular HMGB1 blockade inhibits tumor growth through profoundly remodeling immune microenvironment and enhances checkpoint inhibitor-based immunotherapy. *J Immunother Cancer* 2021;9.
145. Liu B, Huang G, Zhu H, et al. Analysis of gene coexpression network reveals prognostic significance of CNFN in patients with head and neck cancer. *Oncol Rep* 2019;41:2168-80.
146. Zhang X, Feng H, Li Z, et al. Application of weighted gene co-expression network analysis to identify key modules and hub genes in oral squamous cell carcinoma tumorigenesis. *Onco Targets Ther* 2018;11:6001-21.
147. Bard JE, Nowak NJ, Buck MJ, Sinha S. Multimodal Dimension Reduction and Subtype Classification of Head and Neck Squamous Cell Tumors. *Front Oncol* 2022;12:892207.
148. Schmidt M, Edlund K, Hengstler JG, et al. Prognostic Impact of Immunoglobulin Kappa C (IGKC) in Early Breast Cancer. *Cancers (Basel)* 2021;13.
149. Onieva JL, Xiao Q, Berciano-Guerrero MA, et al. High IGKC-Expressing Intratumoral Plasma Cells Predict Response to Immune Checkpoint Blockade. *Int J Mol Sci* 2022;23.
150. Liu K, Hoover AR, Krawic JR, et al. Antigen presentation and interferon signatures in B cells driven by localized ablative cancer immunotherapy correlate with extended survival. *Theranostics* 2022;12:639-56.
151. Slizhikova D, Zinovyeva M, Kuzmin D, et al. Decreased expression of the human immunoglobulin J-chain gene in squamous cell cancer and adenocarcinoma of the lungs. *Molecular Biology* 2007;41:594-600.
152. Isaeva OI, Sharonov GV, Serebrovskaya EO, et al. Intratumoral immunoglobulin isotypes predict survival in lung adenocarcinoma subtypes. *J Immunother Cancer* 2019;7:279.
153. Huang Z, Fan G, Wang D. Downregulation of calbindin 1, a calcium-binding protein, reduces the proliferation of osteosarcoma cells. *Oncol Lett* 2017;13:3727-33.
154. Chiang KC, Yeh TS, Wu RC, et al. Lipocalin 2 (LCN2) is a promising target for cholangiocarcinoma treatment and bile LCN2 level is a potential cholangiocarcinoma diagnostic marker. *Sci Rep* 2016;6:36138.
155. Sun Y, Jiang F, Pan Y, et al. XBP1 promotes tumor invasion and is associated with poor prognosis in oral squamous cell carcinoma. *Oncol Rep* 2018;40:988-98.
156. Liu J, Shen JX, Wu HT, et al. Collagen 1A1 (COL1A1) promotes metastasis of breast cancer and is a potential therapeutic target. *Discov Med* 2018;25:211-23.

157. Lin P, Tian P, Pang J, et al. Clinical significance of COL1A1 and COL1A2 expression levels in hypopharyngeal squamous cell carcinoma. *Oncol Lett* 2020;20:803-9.
158. Yuan L, Shu B, Chen L, et al. Overexpression of COL3A1 confers a poor prognosis in human bladder cancer identified by co-expression analysis. *Oncotarget* 2017;8:70508-20.
159. Kaur R, Chauhan A, Bhat SA, Chatterjee D, Ghoshal S, Pal A. Gene of the month: Cornulin. *J Clin Pathol* 2022;75:289-91.
160. Lee KM, Nam K, Oh S, et al. ECM1 regulates tumor metastasis and CSC-like property through stabilization of beta-catenin. *Oncogene* 2015;34:6055-65.
161. Wang Z, Zhou Q, Li A, Huang W, Cai Z, Chen W. Extracellular matrix protein 1 (ECM1) is associated with carcinogenesis potential of human bladder cancer. *Onco Targets Ther* 2019;12:1423-32.
162. Lin B, Zhang T, Ye X, Yang H. High expression of EMP1 predicts a poor prognosis and correlates with immune infiltrates in bladder urothelial carcinoma. *Oncol Lett* 2020;20:2840-54.
163. Johnson BD, Geldenhuys WJ, Hazlehurst LA. The Role of ERO1alpha in Modulating Cancer Progression and Immune Escape. *J Cancer Immunol (Wilmington)* 2020;2:103-15.
164. Zhang J, Pavlova NN, Thompson CB. Cancer cell metabolism: the essential role of the nonessential amino acid, glutamine. *EMBO J* 2017;36:1302-15.
165. Wang Z, Liu F, Fan N, et al. Targeting Glutaminolysis: New Perspectives to Understand Cancer Development and Novel Strategies for Potential Target Therapies. *Front Oncol* 2020;10:589508.
166. Filippou PS, Karagiannis GS, Musrap N, Diamandis EP. Kallikrein-related peptidases (KLKs) and the hallmarks of cancer. *Critical reviews in clinical laboratory sciences* 2016;53:277-91.
167. Zhou D, He Y, Li H, Huang W. KLK6 mediates stemness and metabolism of gastric carcinoma cells via the PI3K/AKT/mTOR signaling pathway. *Oncol Lett* 2021;22:824.
168. Filippou PS, Karagiannis GS, Musrap N, Diamandis EP. Kallikrein-related peptidases (KLKs) and the hallmarks of cancer. *Crit Rev Clin Lab Sci* 2016;53:277-91.
169. Yin L, Li Q, Mrdenovic S, et al. KRT13 promotes stemness and drives metastasis in breast cancer through a plakoglobin/c-Myc signaling pathway. *Breast Cancer Res* 2022;24:7.
170. Li Q, Yin L, Jones LW, et al. Keratin 13 expression reprograms bone and brain metastases of human prostate cancer cells. *Oncotarget* 2016;7:84645-57.
171. Li C, Liu X, Liu Y, et al. Keratin 80 promotes migration and invasion of colorectal carcinoma by interacting with PRKDC via activating the AKT pathway. *Cell Death Dis* 2018;9:1009.
172. Deng M, Xiong C, He ZK, et al. MCTS1 as a Novel Prognostic Biomarker and Its Correlation With Immune Infiltrates in Breast Cancer. *Front Genet* 2022;13:825901.
173. Reddy SP, Raslan WF, Gooneratne S, Kathuria S, Marks JE. Prognostic significance of keratinization in nasopharyngeal carcinoma. *American journal of otolaryngology* 1995;16:103-8.
174. Li A, Zhu X, Wang C, et al. Upregulation of NDRG1 predicts poor outcome and facilitates disease progression by influencing the EMT process in bladder cancer. *Sci Rep* 2019;9:5166.
175. Lim SC, Geleta B, Maleki S, Richardson DR, Kovacevic Z. The metastasis suppressor NDRG1 directly regulates androgen receptor signaling in prostate cancer. *J Biol Chem* 2021;297:101414.
176. Kataoka A, Yamada K, Hagiwara T, et al. Expression Status of Serine Protease 27: A Prognostic Marker for Esophageal Squamous Cell Carcinoma Treated with Preoperative Chemotherapy/Chemoradiotherapy. *Ann Surg Oncol* 2021;28:5373-81.

177. Xu X, Wei S, Chen Y, Yu D, Wang X, Dong X. Serum Small Proline-Rich Protein 2A (SPRR2A) Is a Noninvasive Biomarker in Gastric Cancer. *Dis Markers* 2020;2020:8493796.
178. Pandey R, Zhou M, Chen Y, et al. Molecular Pathways Associated with Kallikrein 6 Overexpression in Colorectal Cancer. *Genes (Basel)* 2021;12.
179. Pandey R, Zhou M, Islam S, et al. Carcinoembryonic antigen cell adhesion molecule 6 (CEACAM6) in Pancreatic Ductal Adenocarcinoma (PDA): An integrative analysis of a novel therapeutic target. *Sci Rep* 2019;9:18347.
180. Yap LF, Lai SL, Patmanathan SN, et al. HOPX functions as a tumor suppressor in head and neck cancer. *Sci Rep* 2016;6:38758.
181. Ren X, Yang X, Cheng B, et al. HOPX hypermethylation promotes metastasis via activating SNAIL transcription in nasopharyngeal carcinoma. *Nat Commun* 2017;8:14053.
182. Geng Z, Li J, Li S, et al. MAL protein suppresses the metastasis and invasion of GC cells by interfering with the phosphorylation of STAT3. *J Transl Med* 2022;20:50.
183. Lyukmanova EN, Bychkov ML, Sharonov GV, et al. Human secreted proteins SLURP-1 and SLURP-2 control the growth of epithelial cancer cells via interactions with nicotinic acetylcholine receptors. *Br J Pharmacol* 2018;175:1973-86.
184. Throm VM, Mannle D, Giese T, et al. Endogenous CHRNA7-ligand SLURP1 as a potential tumor suppressor and anti-nicotinic factor in pancreatic cancer. *Oncotarget* 2018;9:11734-51.
185. Wang Q, Lv Q, Bian H, et al. A novel tumor suppressor SPINK5 targets Wnt/beta-catenin signaling pathway in esophageal cancer. *Cancer Med* 2019;8:2360-71.
186. Azouz NP, Ynga-Durand MA, Caldwell JM, et al. The antiprotease SPINK7 serves as an inhibitory checkpoint for esophageal epithelial inflammatory responses. *Sci Transl Med* 2018;10.
187. Wu X, Cao W, Wang X, et al. TGM3, a candidate tumor suppressor gene, contributes to human head and neck cancer. *Mol Cancer* 2013;12:151.
188. Feng Y, Ji D, Huang Y, et al. TGM3 functions as a tumor suppressor by repressing epithelial to mesenchymal transition and the PI3K/AKT signaling pathway in colorectal cancer. *Oncol Rep* 2020;43:864-76.
189. Peng XC, Zeng Z, Huang YN, Deng YC, Fu GH. Clinical significance of TM4SF1 as a tumor suppressor gene in gastric cancer. *Cancer Med* 2018;7:2592-600.
190. Tang Q, Chen J, Di Z, et al. TM4SF1 promotes EMT and cancer stemness via the Wnt/beta-catenin/SOX2 pathway in colorectal cancer. *J Exp Clin Cancer Res* 2020;39:232.
191. Pastorekova S, Gillies RJ. The role of carbonic anhydrase IX in cancer development: links to hypoxia, acidosis, and beyond. *Cancer Metastasis Rev* 2019;38:65-77.
192. Doi T, Yoh K, Shitara K, et al. First-in-human phase 1 study of novel dUTPase inhibitor TAS-114 in combination with S-1 in Japanese patients with advanced solid tumors. *Invest New Drugs* 2019;37:507-18.
193. Arteaga CL. The epidermal growth factor receptor: from mutant oncogene in nonhuman cancers to therapeutic target in human neoplasia. *J Clin Oncol* 2001;19:32s-40s.
194. Ha H, Debnath B, Neamati N. Role of the CXCL8-CXCR1/2 Axis in Cancer and Inflammatory Diseases. *Theranostics* 2017;7:1543-88.
195. Guo P, Moses-Gardner A, Huang J, Smith ER, Moses MA. ITGA2 as a potential nanotherapeutic target for glioblastoma. *Sci Rep* 2019;9:6195.
196. Zheng M, Wu C, Yang K, et al. Novel selective hexokinase 2 inhibitor Benitrobenzazide blocks cancer cells growth by targeting glycolysis. *Pharmacol Res* 2021;164:105367.
197. Tripathi A, Shrinet K, Kumar A. HMGB1 protein as a novel target for cancer. *Toxicol Rep* 2019;6:253-61.

198. Cherradi S, Ayrolles-Torro A, Vezzo-Vie N, et al. Antibody targeting of claudin-1 as a potential colorectal cancer therapy. *J Exp Clin Cancer Res* 2017;36:89.
199. Ferrara N, Adamis AP. Ten years of anti-vascular endothelial growth factor therapy. *Nat Rev Drug Discov* 2016;15:385-403.
200. Mondal S, Roy D, Sarkar Bhattacharya S, et al. Therapeutic targeting of PFKFB3 with a novel glycolytic inhibitor PFK158 promotes lipophagy and chemosensitivity in gynecologic cancers. *Int J Cancer* 2019;144:178-89.
201. Liu Y, Zhou Y, Zhang P, Li X, Duan C, Zhang C. CHIP-mediated CIB1 ubiquitination regulated epithelial-mesenchymal transition and tumor metastasis in lung adenocarcinoma. *Cell Death Differ* 2021;28:1026-40.
202. Haberman VA, Fleming SR, Leisner TM, et al. Discovery and Development of Cyclic Peptide Inhibitors of CIB1. *ACS Med Chem Lett* 2021;12:1832-9.
203. Zhu W, Gliddon BL, Jarman KE, et al. CIB1 contributes to oncogenic signalling by Ras via modulating the subcellular localisation of sphingosine kinase 1. *Oncogene* 2017;36:2619-27.
204. Song KH, Oh SJ, Kim S, et al. HSP90A inhibition promotes anti-tumor immunity by reversing multi-modal resistance and stem-like property of immune-refractory tumors. *Nat Commun* 2020;11:562.
